# 1 **A conserved expression signature predicts growth rate and reveals cell &** 2 **lineage-specific differences**

3

4 Zhisheng Jiang<sup>\*3</sup>, Serena Francesca Generoso<sup>\*1</sup>, Marta Badia<sup>2</sup>, Bernhard Payer<sup>+1,2</sup>, Lucas B.  
5 Carey<sup>+2,3</sup>

6

7 <sup>1</sup> Centre for Genomic Regulation (CRG), The Barcelona Institute of Science and Technology, Dr.  
8 Aiguader 88, 08003, Barcelona, Spain.

9 <sup>2</sup> Universitat Pompeu Fabra (UPF), Barcelona, Spain.

10 <sup>3</sup> Center for Quantitative Biology and Peking-Tsinghua Center for Life Sciences, Academy for  
11 Advanced Interdisciplinary Studies, Peking University, Beijing 100871, China

12

13 <sup>†</sup>Correspondence: [bernhard.payer@crg.eu](mailto:bernhard.payer@crg.eu) and [lucas.carey@pku.edu.cn](mailto:lucas.carey@pku.edu.cn)

14 <sup>\*</sup>These authors contributed equally to the work

15

16

## 17 **Synopsis**

18 By performing RNA-seq on cells FACS sorted by their proliferation rate, this study identifies a  
19 gene expression signature capable of predicting proliferation rates in diverse eukaryotic cell  
20 types and species. This signature, applied to scRNAseq data from *C.elegans*, reveals  
21 lineage-specific differences in proliferation during development. In contrast to the  
22 universality of the proliferation signature, mitochondria and metabolism related genes show  
23 a high degree of cell-type specificity; mouse pluripotent stem cells (mESCs) and  
24 differentiated cells (fibroblasts) exhibit opposite relations between mitochondria state and  
25 proliferation. Furthermore, we identified a slow proliferating subpopulation of mESCs with  
26 higher expression of pluripotency genes. Finally, we show that fast and slow proliferating  
27 subpopulations are differentially sensitive to mitochondria inhibitory drugs in different cell  
28 types.

29

30

## 31 **Highlights**

- 32 1. A FACS-based method to determine the transcriptomes of fast and slow proliferating  
33 subpopulations.
- 34
- 35 2. A universal proliferation-correlated transcriptional signature indicates high protein  
36 synthesis and degradation in fast proliferating cells across cell types and species.
- 37
- 38 3. Applied to scRNA-seq, the expression signature predicts correctly the global slowdown  
39 in proliferation during *C. elegans* development, with lineage-specific exceptions.
- 40
- 41 4. Mitochondria membrane potential predicts proliferation rate in a cell-type specific  
42 manner, with ETC complex III inhibitor having distinct effects on the proliferation of  
43 fibroblasts vs mESCs.

44

45

46 **Abstract:**

47 Isogenic cells cultured together show heterogeneity in their proliferation rate. To determine  
48 the differences between fast and slow-proliferating cells, we developed a method to sort  
49 cells by proliferation rate, and performed RNA-seq on slow and fast proliferating  
50 subpopulations of pluripotent mouse embryonic stem cells (mESCs) and mouse fibroblasts.  
51 We found that slowly proliferating mESCs have a more naïve pluripotent character. We  
52 identified an evolutionarily conserved proliferation-correlated transcriptomic signature that  
53 is common to all eukaryotes: fast cells have higher expression of genes for protein synthesis  
54 and protein degradation. This signature accurately predicted growth rate in yeast and cancer  
55 cells, and identified lineage-specific proliferation dynamics during development, using *C.*  
56 *elegans* scRNA-seq data. In contrast, sorting by mitochondria membrane potential revealed a  
57 highly cell-type specific mitochondria-state related transcriptome. mESCs with  
58 hyperpolarized mitochondria are fast proliferating, while the opposite is true for fibroblasts.  
59 The mitochondrial electron transport chain inhibitor antimycin affected slow and fast  
60 subpopulations differently. While a major transcriptional-signature associated with  
61 cell-to-cell heterogeneity in proliferation is conserved, the metabolic and energetic  
62 dependency of cell proliferation is cell-type specific.

63

64 **Introduction**

65 Rates of cell growth and division vary greatly, even among isogenic cells of a single  
66 cell-type, cultured in the same optimal environment[1]. Cell-to-cell heterogeneity in  
67 proliferation rate has important consequences for population survival in bacterial antibiotic  
68 resistance, stress resistance in budding yeast, and chemo-resistance in cancer[2-10].  
69 Time-lapse fluorescence microscopy has shown that cell-to-cell variability in the expression  
70 of some genes, such as *p53* and *p21*, is associated with cell-to-cell variability in proliferation  
71 and survival[1, 11]. While microscopy can identify dynamic relationships between gene  
72 expression and cell fate, it is limited to measurements of one or two genes per cell.  
73 Single-cell RNA sequencing measures transcriptome-level heterogeneity but does not  
74 directly link this to cell-biological heterogeneity in organelle state, or dynamic heterogeneity  
75 in proliferation or drug resistance. Transcriptome-level approaches for understanding  
76 within-population cell-to-cell heterogeneity in proliferation and other dynamic processes are  
77 lacking. While the presence of intrapopulation variation in proliferation, transcriptome, and  
78 organelle-state in both steady-state and in differentiation populations is well established, the  
79 relationship among the three remains unclear.

80

81 One possibility is that the proliferation-correlated gene expression program is the same,  
82 regardless of if one looks at interpopulation variation due to genetic or environmental  
83 differences, or intrapopulation heterogeneity due to epigenetic differences and expression  
84 noise. However, in the budding yeast *Saccharomyces cerevisiae*, the expression program of  
85 intrapopulation heterogeneity in proliferation rate only partially resembles that of cells  
86 growing at different rates due to genetic or environmental perturbations[8]. The relation  
87 between gene expression and proliferation rate is much less well studied in mammalian cells.

88

89 In yeast, in tumors, and in organs, genetic, environmental and developmental changes  
90 cause changes in proliferation rate, and changes in the expression of hundreds or thousands  
91 of genes[12-16]. Unsurprisingly, many of the genes for which changes in expression are  
92 associated with changes in proliferation rate are associated with adverse clinical outcomes in  
93 cancer and with antibiotic and antifungal resistance[17, 18]. Within a population of microbes,  
94 and within a single multicellular organism, the correct balance of proliferation states and  
95 rates is essential. Yet measuring this heterogeneity is difficult, and without such data,  
96 understanding the consequences of this heterogeneity is impossible.

97

98 Gene expression is associated with phenotype, but mRNAs themselves do not often  
99 directly cause phenotypes. Instead, they serve as markers for cell-biological differences  
100 between cells. Phenotypes are mostly driven by larger cell-biological differences between  
101 cells, such as differences in metabolic state. Cell-to-cell heterogeneity in mitochondria state  
102 has been linked to differences in transcription rates, growth rates, proliferation and  
103 developmental trajectories[19-21]. Both cancer cells and pluripotent stem cells have atypical  
104 metabolisms and use glycolysis to produce much of their ATP, instead of the  
105 mitochondria-based oxidative phosphorylation, which is the predominant form of  
106 ATP-generation in differentiated cells[22]. It is unknown if this inter-population variation in  
107 proliferation, transcriptome, and mitochondria extends to intra-population variation among  
108 single cells within a single isogenic population.

109

110 Pluripotent stem cells exist in various states, such as naïve or primed, based on culture  
111 conditions and embryonic origin[23]. Mouse ESCs reflect the naïve pluripotency state of the  
112 blastocyst epiblast and can be cultured in either serum+LIF or 2i+LIF conditions, the latter  
113 involving inhibitors of FGF/ERK and GSK3 pathways. Culture in 2i+LIF conditions promotes a  
114 ground state more closely mirroring the *in vivo* situation with reduced heterogeneity in  
115 pluripotency gene expression and different cell cycle profile when compared to cells grown  
116 in serum+LIF[24-26]. Nevertheless, even in 2i+LIF conditions, mESCs display a certain amount  
117 of cell-to-cell heterogeneity[27, 28] and it is unclear, how this relates to heterogeneity in  
118 differentiated cell types when it comes to gene expression and its link to proliferation rate.

119

120 To understand the relation between intra-population transcriptome heterogeneity and  
121 heterogeneity in proliferation, we developed a FACS-based method to sort cells by  
122 proliferation rate. We applied this method to mouse immortalized fibroblasts and mESCs and  
123 performed RNA-seq on fast, medium and slow proliferating cell sub-populations. We  
124 identified a “proliferation signature”, mostly consisting of ribosome-biogenesis (protein  
125 synthesis) and proteasome-related (protein degradation) genes that are highly expressed in  
126 fast proliferating fibroblasts and ESCs. Moreover, the proliferation signature is conserved  
127 across cell-type and species, from yeast to cancer cells, allowing us to predict the relative  
128 proliferation rate from the transcriptome. We used this gene expression signature to predict  
129 proliferation rates in single cells from scRNA-seq data of *C. elegans* development. Unlike  
130 previous models to predict growth rate from gene expression[29], this model has no free  
131 parameters other than the set of genes, and does not suffer from overfitting – it can predict

132 differences in growth rate in yeast, cancer cells and *C. elegans*, in spite of no data from either  
133 species going into the initial model. When applied to scRNA-seq data from developing *C.*  
134 *elegans*, this model identified a global slowdown in proliferation rate during development,  
135 with lineage-specific exceptions where some lineages maintain constant proliferation scores,  
136 and others even increase proliferation rate. In contrast to the universality of this main  
137 transcriptional signature, many mitochondria-related genes were upregulated in fast  
138 proliferating fibroblasts, yet down-regulated in fast-proliferating mESCs. Consistent with this,  
139 we found that a high mitochondria membrane potential is indicative of slow proliferating  
140 fibroblasts, while in mESCs this is a property of fast proliferating cells. And the mitochondrial  
141 electron transport chain complex III inhibitor Antimycin treatment cause opposite effects on  
142 the proliferation of fibroblasts and ESCs. Fast, but not slow proliferating fibroblasts are  
143 particularly sensitive to the ATP synthase inhibitor oligomycin. Taken together, these results  
144 show the existence of a core protein-synthesis and protein-degradation expression program  
145 that is conserved across cell types and species, from yeast to mice, and a metabolic and  
146 energy-production program that is highly cell-type specific, with cell-type and  
147 proliferation-rate specific consequences on the effects of mitochondria inhibitors.

148

## 149 **Results**

### 150 *A method to sort single mammalian cells by semi-heritable cell-to-cell heterogeneity in* 151 *proliferation rate*

152 To understand the causes and consequences of intrapopulation cell-to-cell heterogeneity  
153 in proliferation rate in mammalian cells we developed a method for sorting single  
154 mammalian cells by their proliferation rate (**Figure 1 and Figure S1**). The cell-permeable dye  
155 carboxyfluorescein succinimidyl ester (CFSE) covalently binds free amines within cells, thus  
156 staining most intracellular proteins at lysine residues. In cell types that divide symmetrically,  
157 such as embryonic stem cells and immortalized fibroblasts[30], the equal dilution of CFSE  
158 into the two daughter cells enables counting of the number of divisions that each cell has  
159 undergone. This method is commonly used to differentiate proliferating from  
160 nonproliferating cells, and to count discrete numbers of cell division, such as in the study of  
161 T- and B-cell proliferation following antigen stimulation[31]. To eliminate confounding effects  
162 due to differences in initial staining we used fluorescence-activated cell sorting (FACS) to  
163 obtain an initially homogeneous cell population of cells with identical CFSE signals (**Figure 1A**  
164 **and Figure S1A, B**). Thus, the initial CFSE signal is independent of initial cell-to-cell variation  
165 in dye uptake or protein content, as the initial distribution is determined by the FACS gate.  
166 CFSE<sub>CFR2</sub> conjugates are stable and unable to exit the cell[32]; the dye signal is stable for over  
167 eight weeks in non-dividing lymphocytes[33]. The measured CFSE signal should be relatively  
168 insensitive to cell-to-cell variation in protein degradation. We cultured this sorted starting  
169 cell population for several generations, during which time the CFSE signal decreases with  
170 each cell division (**Figure 1B**). Consistent with the decrease in CFSE being mostly due to cell  
171 division, the population-level doubling time of each cell type can be calculated based on the  
172 decrease in CFSE signal over time (**Figure 1C, D**), and these doubling times (19-21 hours for  
173 fibroblasts and 10-12 hours for mESCs) are consistent with those reported by other  
174 methods[34, 35].

175



176 To test if the intrapopulation heterogeneity in CFSE that develops after a few doublings  
177 corresponds to intrapopulation heterogeneity in proliferation rates, we stained cells with  
178 CFSE, isolated a homogenous population by FACS, grew ESCs or fibroblasts for 24h or 48h  
179 respectively, and used FACS to isolate the 20% of cells with the highest and lowest CFSE  
180 signal, and measured both viability and the fraction of cells in S phase (**Figure S1C, D**). We  
181 found that fast proliferating (low CFSE) subpopulations maintain higher proliferation rates for  
182 at least three days (**Figure 1E, F and Figure S1E, F**), and found no differences in viability  
183 between CFSE subpopulations (**Table S1**). Thus, intrapopulation differences in CFSE  
184 correspond to semi-heritable differences in proliferation rates.

185

186 To identify genes whose expression is positively or negatively correlated with  
187 proliferation rate within a single population we grew fibroblasts MEF (mouse embryonic  
188 fibroblast) medium and mouse ESCs in pluripotent ground-state promoting 2i+LIF  
189 medium[36], stained cells with CFSE, performed the initial sort to isolate cells with the same  
190 CFSE signal, and then grew fibroblasts for five days, and ESCs for three days. We then used  
191 FACS to isolate cells with high, medium, and low CFSE signal, and performed RNA-seq on  
192 each sub-population (**Figure 1G**).

193

#### 194 *Slow-proliferating ESCs are of more naïve pluripotent character than fast-proliferating ESCs*

195 Embryonic stem cells exhibit cell-to-cell heterogeneity in the expression of naïve  
196 pluripotency marker genes such as *Nanog*, *Stella (Dppa3)* or *Rex1 (Zfp42)*[37-39]. Although  
197 this heterogeneity is most apparent in ESCs cultured in serum+LIF, even when cultured in  
198 ground state-pluripotency-promoting 2i+LIF conditions, the sub-population of ESCs with low  
199 NANOG-levels displays a propensity for lineage-priming and differentiation[28, 40]. To  
200 determine if cell-to-cell variation in proliferation rate was caused by a sub-population of  
201 mESCs initiating a differentiation program, we determined the fold-change in expression  
202 between slow and fast proliferating sub-populations for a set of genes that are upregulated  
203 during lineage commitment (see “Differential expression of pluripotency...” in methods). We  
204 found no consistent enrichment of these differentiation genes in fast versus slow  
205 proliferating cells, as they could be found to be expressed in either population (**Figure 2A**).  
206 However, the slow proliferating subpopulation did have higher expression of genes that are  
207 upregulated in naïve pluripotent cells, and in 2-cell(2C)-like state stem cells (**Figure 2B, C**),  
208 suggesting that slow proliferating mESCs are in a more naïve pluripotent cell state than their  
209 fast proliferating counterparts.

210

#### 211 *Identification of biological processes correlated with proliferation rate that are conserved* 212 *across cell-types and species, and within single populations*

213 To identify functional groups of genes that are differentially expressed between fast and  
214 slow proliferating cells within a single population we performed gene set enrichment analysis  
215 (GSEA)[41, 42] (**Figure 3A, B and Figure S2A, B**) on mRNA-seq data from fast and slow  
216 proliferating subpopulations. We found that in both fibroblasts and ESCs, as well as for  
217 intrapopulation variability in budding yeast FACS-sorted by proliferation rate (data from van  
218 Dijk et al.[8]), genes involved in ribosome-biogenesis and the proteasome are more highly  
219 expressed in fast proliferating cells (**Figure 3C, D and Table S2**). High expression of ribosomal

220 genes is a common signature for fast proliferating cells[12, 43], and cancer cells often exhibit  
221 high proteasome expression[44-46], but it is not clear if this is related to proliferation  
222 in-and-of-itself or due to aneuploidy and other genetic alterations[47]. Our results suggest  
223 that coordinated regulation of the ribosome and proteasome is an intrinsic signature of fast  
224 proliferating cells that is conserved across cell-types and species.

225

226 To test if the coupling between ribosome biogenesis and proteasome expression holds  
227 across species and in diverse cell types, we analyzed the bulk RNA-seq data across  
228 developmental stages, covering multiple organs in seven species[16]. Ribosome biogenesis  
229 and proteasome expression are highly correlated (**Figure 3E**). The coordinated expression  
230 change with developmental stages between ribosome biogenesis genes and proteasome  
231 genes across organs and species suggests that the coordination between protein synthesis  
232 and degradation is likely to be a conserved feature across a large number of species and  
233 cell-types (**Figure S2D**).

234

235 In addition to ribosome-biogenesis and the proteasome, several other gene sets are  
236 differentially expressed between fast and slow proliferating cells in both fibroblasts and ESCs  
237 (**Figure 3C**). mTORC1 (mammalian Target Of Rapamycin Complex 1) functions as a nutrient  
238 sensor and regulator of protein synthesis, and is regulated by nutrient and cytokine  
239 conditions that cause differences in proliferation[48, 49]. We find that, even in the absence  
240 of genetic and environmental differences, mTORC1 is more active in fast proliferating cells.  
241 Activation of mTORC1 can promote ribosome-biogenesis[48, 50], however, there is still  
242 controversy about the regulation of proteasome activity by mTORC1[49, 51-55].

243

244 The transcription factor MYC (**Figure S2C**), and MYC target genes (**Figure 3C and Table S2**)  
245 are more highly expressed in fast proliferating cells. MYC is frequently amplified in cancer,  
246 regulates the transcription ~15% of all genes[56] and is a master regulator of cell  
247 proliferation[57]. Overexpression of MYC promotes ribosome-biogenesis and cell growth  
248 rates[58, 59], and active mTORC1 can promote MYC activation[60, 61]. Our data suggest that  
249 increased expression of MYC and increased mTORC1 activity are general properties of  
250 fast-proliferating cells, and those genetic or environmental perturbations are not necessary  
251 to cause differential expression of these pathways.

252

### 253 *Defining a proliferation signature to predict the growth rate across species*

254 Expression of typical proliferation markers, such as PCNA and Ki67, did not correlate  
255 with intra-population heterogeneity in proliferation (**Figure 4A**). The high degree of  
256 conservation of genes whose expression correlates with intra-proliferation heterogeneity in  
257 proliferation, from yeast to mouse, suggests that there should be a set of genes whose  
258 expression is predictive of growth rate across all eukaryotes. To build such a set we combined  
259 “proliferation correlated genes” – those with a Spearman correlation of  $\rho = 1$  in both  
260 fibroblasts and ESCs (243 genes) with genes from six ribosome biogenesis and proteasome  
261 related gene sets that are significantly enriched in both fibroblasts and ESCs, which result in  
262 a final gene set consisting of 370 genes (**Table S4**), from whose expression we can calculate a  
263 proliferation signature score.

264

265 To test the ability of this proliferation signature to predict proliferation rates in new data  
266 we used out-of-species cross-validation. While several models have been developed to  
267 predict growth rates from gene expression[29], the performance of these models has been  
268 evaluated using within-experiment cross validation, in which a single sample (e.g., condition  
269 or genotype) was held-out (excluded) and used for testing model performance. Accurate  
270 prediction of growth rates in cells for which actual growth rates cannot be measured, such as  
271 tumors *in-vivo*, or from single-cell RNA-sequencing data, would be more useful. However,  
272 models tested using in-experiment cross-validation (also known as internal validation) are  
273 often over-fit, resulting in poor performance when the model is applied to new data from  
274 new experiments[62].

275

276 To overcome this problem, we used the proliferation signature from above, which was  
277 developed using data from mouse cells, to predict growth rate from gene expression in  
278 budding yeast. Our model has correlations of  $R = 0.82$ ,  $0.73$  and  $0.77$  across three different  
279 datasets (**Figure 4B**, **S3B** and **S3C**). In contrast, the model of Wyotck et al.[29], which was  
280 trained on these yeast data, has an out-of experiment predictive power of  $R < 0.15$  (Figure S6  
281 in Wyotck et al.[29]). The Wyotck et al. model is over-fit and cannot predict proliferation  
282 rates in new data. Similarly, our model has better performance ( $R = 0.65$ ) than a  
283 cancer-specific model[63], which was trained on cancer cell-line data and cannot predict  
284 out-of-experiment (**Figure 4C**) (Figure 4 in Waldman et al.[63]). In contrast to most published  
285 models, our proliferation signature score model performs well on data on which it has not  
286 been trained.

287

288 When run on FACS-sorted 2C-like embryonic stem cells (2C::tdTomato+)[64], our  
289 proliferation signature model predicts that 2C-like mESCs proliferate slower (**Figure 4D**).  
290 2-cell embryos also have uniquely low proliferation scores (**Figure S4H**). These results are  
291 experimentally independent of, and biologically consistent with, our observation that  
292 expression of 2C-like cell state marker genes is higher in slow proliferating mESCs (**Figure 2C**).  
293 This provides further evidence that the proliferation signature we have identified can be  
294 universally applied to predict the proliferative state of many cell types.

295

296 *Prediction of lineage-specific changes in proliferation rates during C. elegans development by*  
297 *the proliferation signature*

298 Expression of the most commonly used markers (PCNA and Ki67) for measuring  
299 proliferation rates in bulk populations are cell-cycle regulated; what is really being measured  
300 is the fraction of the population that is in S-phase (PCNA) or is not in G0 (Ki67). Expression of  
301 these markers does not measure proliferation rates in single cells. Single-cell RNA sequencing  
302 is a powerful method for understanding development and differentiation *in vivo*, but it  
303 suffers from high levels of noise at the single-gene level[65]. We reasoned that our  
304 proliferation signature model would be ideal for measuring the proliferation rates of single  
305 cells from scRNA-sequencing data, as the model takes into account the expression of >300  
306 genes, most of which are highly expressed and therefore have low levels of technical noise.  
307 To test the ability of the proliferation signature model on scRNAseq data we used a dataset

308 of 89,701 cells from *C. elegans* development[66]. We computed the proliferation signature  
309 score for each cell and divided the cells into terminal cell types vs preterminal cells.  
310 Non-terminally differentiated cells have a higher proliferation signature score (t-test,  $p =$   
311  $4.9 \times 10^{-41}$ ) (**Figure 5A**). A visual comparison of the 89,701 cells in UMAP space, colored by  
312 either embryo age[66] or by proliferation signature score (**Figure 5B**), suggested that,  
313 globally, proliferation rates in single cells decreases as development proceeds. However,  
314 three clusters of cells did not follow this pattern: germline, intestine and M cells. To quantify  
315 the relationship between proliferation rates of single cells and developmental time we  
316 binned all cells with same embryo time, and calculated the correlation between proliferation  
317 score and developmental time (**Figure 5C**). The proliferation signature score decreases as the  
318 embryo develops ( $\rho = -0.65$ ,  $p = 9.3 \times 10^{-19}$  and  $\rho = -0.73$ ,  $p = 8.7 \times 10^{-24}$  when excluding  
319 the three outlier groups (**Figure S4B**). This conclusion from our single-cell gene expression  
320 analysis using the proliferation signature score is therefore quantitatively consistent with  
321 lineage-tracing microscopy data from Sulston et al.[67], showing that the rate of cell division  
322 within the developing nematode decreases during development (**Figure S4D, S4E**).

323

324 To our surprise, the predicted proliferation rates increased after 650 minutes (**Figure**  
325 **S4C**). To understand why, we grouped all cells in 650 minutes or older by lineage (**Figure 5D**).  
326 The three outlier groups from UMAP space: germline, M cell and intestine, had the highest  
327 proliferation signature among all cell types late in development. Specifically, for these three  
328 cell types, the proliferation score did not decrease with the embryo time, but increased or  
329 maintained a high level (**Figure 5E**). This can be explained by lineage-specific characteristics:  
330 the germline is the only cell type in *C. elegans* that is continuously proliferating, M cells are a  
331 highly proliferative single mesodermal blast cell, and the intestinal cells, although they do  
332 not proliferate, continue to increase in both biomass and DNA content through  
333 endoreplication. Other cell types with high proliferation scores, such as Z1/Z4, are also  
334 known to continue proliferation after 650 minutes[68]. The proliferation signature score  
335 decreases with embryo time for most cell types, including body wall cell, hypodermis and  
336 ciliated amphid neuron, which are the most prevalent in the single cell RNA-seq dataset  
337 (**Figure 5E**).

338

339 Two cell types, hypodermis and seam cells, exhibited very low proliferation signature  
340 scores at late time points, while intestinal cells exhibited very high proliferation scores  
341 (**Figure 5D, S4F**). Both these cell types contain multinucleated cells, but these multinucleated  
342 cells arise through very different mechanisms: hypodermis and seam cells through cell-fusion,  
343 and intestine through endoreplication[68]. Thus, two cell types with seemingly similar  
344 properties have highly divergent transcriptomes, and highly divergent mechanisms to reach  
345 their similar final state.

346

347 Upon development to an L1 larva, a nematode has more than half of the final number  
348 of cells present in the adult. In contrast, mammals continue to rapidly increase in cell  
349 number even after embryonic development is complete. This difference can be seen in the  
350 change in proliferation signature over time, which decreases in *C. elegans*, but increases in  
351 human (data from Petropoulos et al.[69]) and mouse (data from Deng et al.[70]) (**Figure 5F, G**

352 **and S4G, H)**. In conclusion, our proliferation signature genes obtained from mouse fibroblast  
353 and ESC data can predict dynamic changes in proliferation rates during the development of  
354 various cell types and species, thereby confirming its universal applicability.

355

356

357 *Cell-to-cell heterogeneity in mitochondria state predicts variation in proliferation both in ESCs*  
358 *and fibroblasts, but in opposite directions.*

359 While the pattern of within-population proliferation-correlated expression in yeast,  
360 mouse fibroblasts and ESCs was broadly similar with regard to genes involved in protein  
361 synthesis and degradation, the behavior of metabolic and mitochondria-related genes in fast  
362 and slow proliferating subpopulations was highly cell-type specific. Mitochondria membrane  
363 and respiratory chain-related gene sets were more highly expressed in fast proliferating  
364 fibroblasts, but not in fast proliferating ESCs (**Table 1**). These results are consistent with  
365 differential mitochondrial states in ESCs when compared to differentiated cells like  
366 fibroblasts[22], which suggests the existence of different types of metabolism and  
367 proliferation-related heterogeneity between pluripotent and differentiated cell-types. We  
368 also observed cell-type specific differences in glycolysis, fatty acid metabolism, and other  
369 metabolic processes, suggesting fundamental differences in the metabolic pathways required  
370 for fast proliferation between pluripotent ESCs and differentiated cells like fibroblasts (**Table**  
371 **1**).

372

373 The mitochondrial membrane potential is a major predictor of cell-to-cell heterogeneity  
374 in proliferation rate in budding yeast[9]. Mitochondria-related genes are more highly  
375 expressed in the fast proliferating subpopulation of fibroblasts (**Table 1**). In contrast, these  
376 genes are slightly more highly expressed in the slow proliferating subpopulation of ESCs. This  
377 suggests that the relation between cell-to-cell heterogeneity in mitochondria state and  
378 proliferation may be different in these two cell types. To test the ability of mitochondrial  
379 membrane potential to predict proliferation rate in mammalian cells we used the  
380 mitochondria membrane potential-specific dye tetramethylrhodamine ethyl ester (TMRE) to  
381 stain fibroblasts and ESCs, and performed both RNA-seq and proliferation-rate assays on high  
382 and low TMRE sub-populations (**Figure 6A**).

383

384 Unlike the proliferation-based sort (**Figure 1**), sorting ESCs and fibroblasts by  
385 mitochondria-state (**Figure 6 and Figure S5A, B**) resulted in highly divergent expression  
386 profiles. ESCs with high TMRE signal had high expression of ribosome-biogenesis,  
387 proteasome, MYC-targets and mitochondria-related genes, while in fibroblasts these gene  
388 sets are more highly expressed in the low TMRE sub-population (**Figure 6B, C and Table S5**).  
389 This is consistent with the opposite behavior of mitochondria-related gene sets in  
390 proliferation-rate sorted cells from the two cell types (**Table 1**). We note that the differences  
391 between high and low TMRE populations are smaller than the difference between high and  
392 low CFSE population (**Figure S5C, D**), either due to technical limitation of the dye, or because  
393 there is less heterogeneity in mitochondria state than there is in proliferation rate.

394

395 These expression data make the following prediction: ESCs with high TMRE should have a



396 shorter doubling time, while fibroblasts with high TMRE should have a longer doubling time.  
397 To test this, we sorted fibroblasts and ESCs by TMRE, and found that high TMRE fibroblasts  
398 indeed do proliferate more slowly, while high TMRE ESCs proliferate more rapidly (**Figure 6D**).  
399 In addition, we tested the effect of ascorbic acid (vitamin C, an antioxidant) and O<sub>2</sub> levels  
400 (ambient 21% atmospheric vs. low 5% physiological levels) on doubling time, but found no  
401 significant effects (**Table S6**).

402

403 To investigate additional cell types, we searched for RNA-seq data for cells sorted by  
404 mitochondria state, and analyzed RNA-seq data of mouse CD8<sup>+</sup> T-lymphocytes that have  
405 been sorted by mitochondria membrane potential (TMRM)[21]. CD8<sup>+</sup> T cells with high  
406 TMRM signal (high  $\Delta\Psi_m$ ) showed higher expression of ribosome-biogenesis and proteasome  
407 related genes (**Table S7**), and proliferate more rapidly[21], thereby behaving in a similar  
408 fashion to ESCs.

409

410 Thus, across yeast, mouse ESCs, fibroblasts and CD8<sup>+</sup> T cells, while mitochondria state  
411 and proliferation rate co-vary within a single population, the direction of this correlation is  
412 different, with yeast and fibroblasts behaving similarly with each other, and opposite to ESCs  
413 and CD8<sup>+</sup> T cells.

414

415

416 *Perturbation of mitochondria function affects fast and slow proliferating fibroblasts and ESCs*  
417 *in different ways.*

418 In order to investigate the relation between proliferation rate, cell type, and  
419 mitochondrial state, we performed perturbation experiments by directly inhibiting  
420 mitochondria function. We stained both mouse ESCs and fibroblasts with CFSE and sorted 20%  
421 of the viable cells on the peak of CFSE signal to have a homogeneous starting population.  
422 After culturing them for 24h or 48h respectively, two bins were sorted: the lowest 20% (fast  
423 proliferating cells) and the highest 20% CFSE (slow proliferating cells) (**Figure 7A**). We then  
424 cultured the sorted cells with either medium containing DMSO as mock control, the  
425 mitochondrial electron transport chain complex III inhibitor Antimycin, the ATP synthase  
426 inhibitor Oligomycin for 16h, washed out the drugs, and measured both viability and  
427 proliferation rate.

428

429 Both fast fibroblasts and ESCs sorted by CFSE signal maintained a higher fraction of cells  
430 in S-phase over two days in growth-media with DMSO, indicating that the proliferation status,  
431 fast vs slow, is semi-heritable (**Figure 7B, S6A**). Interestingly, we found cell-type and  
432 proliferation-state specific effects of mitochondria perturbation. Antimycin strongly  
433 decreased the fraction of slow-proliferating fibroblasts that were in S-phase but had a  
434 weaker effect on fast-proliferating fibroblasts (t-test,  $p = 0.0089$ ) (**Figure 7C**). In ESCs, the  
435 effect of antimycin appeared somewhat stronger on fast- than on slow-proliferating cells  
436 (although it did not differ significantly).

437

438 In contrast, fast proliferating fibroblasts were highly sensitive to oligomycin treatment.  
439 Specifically, we observed a change in cell morphology upon treatment (**Figure 7D**). In



440 comparison with DMSO-treated cells, the cells lost their elongated shape and became more  
441 round and smaller. This led us to hypothesize if that morphology change might be explained  
442 by a mesenchymal to epithelial transition (MET) upon oligomycin treatment. In fact, during  
443 induced pluripotent stem cell (iPSC) reprogramming, MET of fibroblasts is an important early  
444 reprogramming step[71, 72]. In that context, oligomycin treatment has been recently shown  
445 not only to promote a metabolic switch from oxidative phosphorylation to glycolysis, but also  
446 to modulate mesenchymal markers during reprogramming[72, 73]. Therefore we measured  
447 the protein levels of the regulators N-cadherin (mesenchymal marker expressed in  
448 fibroblasts) and E-cadherin (epithelial marker expressed in ESCs) with and without treatment,  
449 by both immunostaining and Western Blot (**Figures 7E and S6A-C**). We could not detect  
450 E-cadherin in fibroblasts, but we observed reduced expression of N-cadherin in comparison  
451 with DMSO treated-cells in particular in oligomycin-treated fast cycling fibroblasts (**Figure 7E**  
452 **and S6A-C**). In addition to the change in morphology, oligomycin treatment reduced cell  
453 viability specifically in fast proliferating fibroblasts, but not in slow fibroblasts (**Figure 7F**). In  
454 conclusion, although we observed both a change in cell viability, morphology and a reduction  
455 in N-cadherin levels, oligomycin treatment did not induce a complete mesenchymal to  
456 epithelial transition in the fast-proliferating fibroblasts as indicated by the lack of E-cadherin  
457 upregulation. Nevertheless, the distinct effects of antimycin treatment on the proliferation of  
458 fibroblasts and ESCs and the subpopulation-specific effect of oligomycin on fast fibroblasts  
459 are in line with a differential dependency on mitochondrial function between the different  
460 subpopulations of fibroblasts and ESCs.

461  
462

## 463 Discussion

464 In summary, we have developed a method to sort cells by their proliferation rate and  
465 used these data to identify a pattern of proliferation-correlated gene expression that is  
466 conserved among eukaryotes. We used these data to develop a model that can predict  
467 proliferation rates from gene expression in multiple eukaryotic species and cell types, and for  
468 types of data, such as single-cell RNA sequencing in a developing organism, for which  
469 proliferation rates cannot be measured experimentally.

470

471 While the CFSE signal is not a measure of the instantaneous proliferation rate, but  
472 instead determined by the average proliferation rate integrated over several days, the fact  
473 that (A) the transcriptomes of the sorted cells are predictive of proliferation rates, and (B)  
474 the cells with low CFSE maintain faster proliferation rates over at least three days, suggests  
475 that there are not likely to be large differences in the instantaneous proliferation rate vs the  
476 average rate, at least for these cell types and experimental timescales.

477

478 We found that genes involved in protein synthesis (ribosome-biogenesis, translation  
479 initiation), and in protein degradation (the proteasome and proteasome-related protein  
480 degradation) are highly expressed in fast proliferating eukaryotic cells, including mammalian,  
481 nematode and yeast cells. Previous studies have reported that high expression of the  
482 proteasome in fast-growing cells may be necessary in order to degrade misfolded protein,  
483 because the fast protein synthesis in fast-growing cells produce more incorrectly folded

484 proteins[49, 74, 75]. Even with a constant translation and folding error rate, fast proliferating  
485 cells will produce more protein, and therefore more misfolded protein that needs to be  
486 degraded.

487

488 In all non-cancer mammalian cells we investigated, we also found the mTORC1 signaling  
489 pathway enriched in fast proliferating cells and P53-targets enriched in slow proliferating  
490 cells. Our results show both upregulations of the mTORC1 signaling pathway and  
491 proteasome activity in fast proliferating cells, which is consistent with several previous  
492 studies[9, 12-15].

493

494 Our analysis of fast versus slow proliferating ESCs cultured in 2i+LIF conditions indicated  
495 at several levels that slow proliferating cells were of a more naïve ground state pluripotent  
496 character than fast proliferating cells. First, this was supported by the fact that they displayed  
497 a higher expression of naïve pluripotency marker genes and markers of 2C-like cells (**Figure**  
498 **2B, C**). Second, we observed enrichment of E2F targets and genes involved in G1 S cell cycle  
499 phase transition (**Table 1**) in our fast cycling ESC population, indicative of a shortened G1  
500 phase and a shorter doubling-time, as described for ESCs cultured in serum+LIF [26]. Finally,  
501 although we could find differentiation genes to be expressed both in fast and slow  
502 proliferating cells (**Figure 2A**), we saw several differentiation pathways to be enriched  
503 specifically in fast dividing ESCs (**Table 1**). In summary, even when ESCs are cultured in  
504 ground-state pluripotency promoting 2i+LIF conditions, they display heterogeneity in  
505 proliferation rate, with the slow proliferating being of more naïve pluripotent character when  
506 compared to fast dividing cells.

507

508 While we observed ESCs behave similarly to other cell types like fibroblasts or yeast  
509 when it comes to gene expression signatures characteristic of fast proliferating cells related  
510 to protein synthesis and turnover (**Figure 3C**), we found a very different behavior when it  
511 comes to regulation of metabolism. Although the growth rate can be predicted by  
512 mitochondrial membrane potential in *Saccharomyces cerevisiae*[23], where it is negatively  
513 correlated with proliferation rate like in fibroblasts as we show in this study, our results show  
514 mitochondrial membrane potential to be positively correlated with proliferation rate in ESCs  
515 (**Figure 6D**). This suggests mitochondrial membrane potential has different functions in  
516 pluripotent cells when compared to differentiated cell types or yeast. This is corroborated by  
517 our gene expression analysis of cells with high vs. low mitochondrial membrane potential  
518 (**Figure 6B, C**), where we found pathways linked with fast proliferating cells to be enriched in  
519 fibroblasts with low mitochondrial membrane potential but on the contrary, enriched in ESCs  
520 with high mitochondrial membrane potential. Surprisingly, primed pluripotent stem cells  
521 have been described to rely more on non-oxidative, glycolysis-based metabolism than naïve  
522 pluripotent stem cells[76-78], which appears in contradiction with our result that our slow  
523 proliferating, mitochondria activity low ESCs being more naïve-like. However, TMRE is not a  
524 direct measure of ATP generation by mitochondria; yeast cells that are respiring and  
525 producing all of their ATP using their mitochondria, and yeast cells unable to respire, both  
526 have high TMRE signals[9]. Differentiated cells in general rely more on oxidative metabolism  
527 than pluripotent cells, therefore our fast proliferating ESCs could potentially reflect a more

528 differentiation prone state.

529

530 *In vivo*, cells exhibit a great degree of variability in proliferation rates, from terminally  
531 differentiated neurons, to slowly proliferating cancer stem cells, to rapidly proliferating  
532 embryonic stem cells. Many cell types, such as hemopoietic stem cells, contain both  
533 proliferating and non-proliferating populations. The proliferation signature model, because  
534 of its applicability across all tested species and cell types, provides a useful tool for  
535 understanding *in vivo* development for systems, in which precise measurements of  
536 proliferation are impossible. Our model has been validated on scRNA-seq data, using  
537 published time-lapse microscopy of cell lineages in *C. elegans* as the ground truth[67].  
538 However, it is technically challenging to do microscopy or to otherwise measure proliferation  
539 of individual cells inside of a developing mouse embryo, or in a tumor in a patient. Models  
540 that can accurately predict difficult to measure properties, such as proliferation rate, from  
541 easy to measure ones, such as gene expression, will therefore aid in our understanding of  
542 complex biological processing during tumor formation, differentiation, and development.

543

## 544 MATERIALS AND METHODS

545

### 546 Cell culture growth conditions

547 Tail tip fibroblasts (TTFs) were isolated from a female newborn mouse from a *Mus musculus*  
548 *x Mus Castaneus* cross and immortalized with SV40 large T antigen[79]. The clonal line  
549 68-5-11[80] was established and maintained in DMEM supplemented with 10% serum  
550 (LifeTech), HEPES (30mM, Life Tech), Sodium Pyruvate (1mM, Life Tech), non-essential amino  
551 acids (NEAA) (Life Tech), penicillin-streptomycin (Ibian Tech), 2-mercaptoethanol (0.1mM,  
552 Life Tech).

553 The mouse embryonic stem cell (ESC) line EL16.7 (40XX, *Mus musculus/M.castaneus* hybrid  
554 background[81] was maintained on gelatin coated tissue culture dishes and passaged every 2  
555 days by seeding around  $2 \times 10^6$  cells in 2i+LIF medium. Accutase (Merck Chemicals and Life  
556 Science) was regularly used for cell detachment when passaging cells. 2i+LIF medium  
557 contains a 1:1 mixture of DMEM/F12 supplemented with N2 (LifeTech) and neurobasal  
558 media (LifeTech) supplemented with glutamine (LifeTech), B27 (LifeTech), insulin (Sigma),  
559 penicillin-streptomycin (Ibian Tech), 2-mercaptoethanol (LifeTech), LIF (Orfgenetics),  
560 PD0325901 (Sigma) and CHIR9021 (Sigma). Both TTFs and EL16.7 were cultured at 37C in 5%  
561 CO<sub>2</sub>.

562

### 563 Proliferation and doubling time analysis

564 ESCs and fibroblasts were plated on 10 cm plates at  $5.3 \times 10^6$  and  $7.3 \times 10^5$  concentrations,  
565 respectively. Cells were expanded and counted for 7 days. To monitor distinct generations of  
566 proliferating cells, carboxyfluorescein succinimidyl ester (CFSE, Thermo Fisher Scientific) was  
567 used to stain the cells and the dilution of the dye was detected by flow cytometry every day.  
568 CFSE was dissolved in dimethyl sulfoxide at a concentration of 5 mM as stock solution and  
569 CFSE was added to a 1 ml cell suspension, to a final concentration of 5uM or 10uM. After the  
570 addition of CFSE, cells were incubated at 37°C for 20 min. Then the cells were washed twice  
571 with complete medium and maintained on ice until use in a buffer containing PBS, 2% serum

572 and 1% pen-strep. Cell viability was determined by DAPI (Biogen Cientifica) staining. Dye  
573 signals were measured on an LSRII flow cytometer.

574

#### 575 **RNA-seq**

576 To collect cells with different growth rates, cells were isolated by sorting at room  
577 temperature according to the CFSE signal (median and high CFSE signal). ESCs and fibroblasts  
578 were sorted into 1.5 ml Eppendorf tubes containing medium and were cultured for 3 days  
579 and 5 days respectively in specific culture conditions as described earlier. For each cell line  
580 three bins were sorted: the lowest 10%, the median 10% and the highest 10% CFSE. Cells  
581 were sorted into prechilled 1.5-ml Eppendorf tubes containing 200  $\mu$ l medium each. Cells  
582 were then centrifuged at 1000 rpm for 5 min, the media removed and the resulting cell pellet  
583 was used for RNA extraction. All bins were treated identically throughout the process.  
584 Cellular RNA was extracted using the Maxwell RNA Purification Kit and processed for RNA  
585 sequencing. For biological replicates, all experiments were repeated on three or four  
586 different days. Expression was quantified using Kallisto v0.42.3[82] from the raw reads (no  
587 pre-processing) using the gencode.VM18.transcript annotations. We experimented with  
588 multiple methods for batch effect removal using the R package SVA[83] and found that the  
589 results of the GSEA, with regards to which gene sets were differentially expressed between  
590 fast and slow, or high and low TMRE cell populations, did not change. We therefore used the  
591 original data.

592 PCA on TMRE sorted biological replicates showed that one TMRE sort was an extreme outlier  
593 (**Figure S5C**); this pair was discarded from all analysis.

594

#### 595 **BrdU Staining**

596 Cell Proliferation was measured by the incorporation of bromodeoxyuridine (BrdU). Every  
597 24h BrdU was added at a final concentration of 10  $\mu$ M to the cells. Incubation under the  
598 appropriate growth conditions occurred for 30 minutes for ESCs and 45 minutes for  
599 fibroblasts to pulse label the cells. Cells were trypsinized, spun down at 1050 rpm for 5  
600 minutes. After washing them in ice-cold PBS, cells were fixed overnight in ice cold Ethanol  
601 (70%) while maintaining a gentle vortex. The following day the Ethanol fixed cells were  
602 centrifuged and the DNA denatured by adding 2N HCl - 0.5%Triton X-100 for 30min at room  
603 temperature. Then cells were centrifuged and resuspended in 0.1 M  $\text{Na}_2\text{B}_4\text{O}_7$ , pH 8.5 for 10  
604 minutes at room temperature. After spinning them down the cells were incubated overnight  
605 at 4C with PerCP/Cy5.5 anti-BrdU (1:30 dilution) (BioLegend) in a buffer containing 0.5%  
606 Tween 20 / 1% BSA/PBS and RNase (0.8 mg/ml). The following day cells were washed in PBS  
607 and spun down at 1050rpm for 5min at room temperature. The pellet was resuspended in  
608 PBS with DAPI (1:1000) and analyzed in an BD LSRII flow cytometer.

609

#### 610 **Mitochondria inhibitor treatment assay**

611 For the assessment of chemical inhibitors on membrane potential changes, cells were  
612 incubated with medium containing DMSO (0.1%, mock control), Antimycin A (500 nM),  
613 Oligomycin (1 $\mu$ M) for 16h. Cells with or without treatment were washed with PBS and  
614 trypsinized. After spinning the cells for 5 minutes at 1050 rpm at room temperature, the cell  
615 pellet has been stained with 50nM TMRE for 20 min at 37C. After 2 times washes with PBS,

616 cells were resuspended in PBS containing DAPI and immediately analyzed by flow cytometer  
617 BD LSRII.

618

#### 619 **Western blot**

620 Cells were lysed in a lysis buffer (20 mM Tris-HCL, pH 8.0, 150 mM NaCl, 1% Triton X-100,  
621 supplemented with protease inhibitors cocktail) and centrifuged for 30 minutes at 16000g.  
622 The supernatant was boiled in SDS loading buffer. After SDS-PAGE, the samples were  
623 transferred to a polyvinylidene difluoride membrane using a transfer apparatus according to  
624 the manufacturer's protocols (Bio-Rad). After incubation with 5% nonfat milk in TBST (10  
625 mM Tris, pH 8.0, 150 mM NaCl, 0.5% Tween 20) for 1h, the membrane was washed once  
626 with TBST and incubated with antibodies against N-Cadherin (BD Biosciences, 1:1000),  
627 E-Cadherin (BD Biosciences, 1:1000), GAPDH (Santa Cruz, 1:5000), at 4 °C for 16 h.  
628 Membranes were washed three times for 10 min and incubated with a 1:5000 dilution of  
629 Rabbit Anti-Mouse Immunoglobulins/HRP for 1.5 h. Blots were washed with TBST three  
630 times and developed with the ECL system (Amersham Biosciences) according to the  
631 manufacturer's protocols.

632

#### 633 **Immunofluorescence staining**

634 Cells were grown in 8-well Lab-Tek chamber slides (Thermo Fisher Scientific) and fixed in 4%  
635 paraformaldehyde for 10min at room temperature. Then, washed three times in PBS. Fixed  
636 cells were permeabilized in 0,5% Triton X-100 (Sigma-Aldrich) in PBS buffer for 10min at  
637 room temperature. And then washed in PBST (PBS with 0.1% Tween (Sigma-Aldrich)) for  
638 2min at RT. Then cells were incubated in a blocking solution containing 10% bovine serum  
639 albumin (BSA, Sigma) and 0.01% Triton X-100 for 1h at room temperature. Cells were then  
640 left at 4°C overnight in a blocking solution containing the primary antibody: mouse  
641 E-Cadherin (BD Biosciences, 1:1000) and mouse N-Cadherin (BD Biosciences, 1:1000). The  
642 next day, the cells were washed three times in PBS and then incubated with the secondary  
643 antibody for 45min at room temperature. Goat anti-mouse IgG, (1:1000, Life Technologies)  
644 conjugated to Alexa Fluor-555, was used as a secondary antibody. Nuclear staining was  
645 performed with DAPI (1:1000, Biogen Cientifica). Images were taken with a Leica TCS SP8  
646 confocal microscopy system and were analyzed with Fiji (ImageJ).

647

#### 648 **Differential expression of pluripotency, 2C-like state and lineage commitment-related 649 genes in mESCs sorted by proliferation rate (CFSE)**

650 Pluripotent state gene markers are chosen from 4 different studies[28, 84-86], only genes  
651 that are used as pluripotent state gene marker in at least 2 of these 4 papers are used in this  
652 paper. Lineage commitment and 2C-like state gene markers are the same as genes in Figure  
653 5A and key differentiation regulators in Figure 6 of Kolodziejczyk et al.[84]. To see the  
654 corresponding pluripotent cell state of fast and slow proliferating mESCs, we calculated the  
655 mean expression of naïve pluripotent markers in four fast-proliferating and four  
656 slow-proliferating replicates and  $\log_2(\text{fast/slow})$  was calculated to compare genes expression  
657 in fast proliferating subpopulation and slow proliferating sub-population. The same method  
658 was applied to lineage commitment gene markers and 2C-like state gene markers.

659



660 **Mitochondrial Membrane Potential Measurements.**

661 The relative mitochondrial transmembrane potential ( $\Delta\Psi_m$ ) was measured using the  
662 membrane-potential-dependent fluorescent dye TMRE (Tetramethylrhodamine, Ethyl Ester,  
663 Perchlorate) (Molecular Probes, Thermo Fisher Scientific)[87]. For TMRE staining fibroblasts  
664 and ESCs were grown, washed in PBS, trypsinized and resuspended in PBS with 0.1% BSA and  
665 TMRE added at a final concentration of 50nM, from a 10uM stock dissolved in DMSO. Cells  
666 were incubated for 20min at 37C, washed with PBS and were analyzed by flow cytometry or  
667 sorted.

668

669 **Cell sorting**

670 Cells at 80% confluence in 10cm plates were trypsinized, centrifuged at 1000rpm for 5min  
671 and stained with medium containing 10uM CFSE for 20min. Then cells were washed twice  
672 with PBS and stained with DAPI as viability dye. To have a homogeneous starting population,  
673 20% of the viable cells were sorted according to the proliferation rate on the peak of CFSE  
674 signal and re-plated. ESCs and fibroblasts have been cultured for 24h or 48h respectively and  
675 two bins were sorted: the lowest 20% (fast proliferating cells) and the highest 20% CFSE  
676 (slow proliferating cells). Cells were sorted into prechilled 1.5-ml Eppendorf tubes containing  
677 200  $\mu$ l medium each. Cells were then centrifuged at 1000 rpm for 5 min, the media removed  
678 and plated in their culture medium. To monitor their proliferation rate the dilution of the  
679 CFSE dye was detected by flow cytometry every day up to 3 days for ESCs and 5 days for  
680 fibroblasts. Dye signals were measured on an LSRII flow cytometer.

681

682 For the CFSE sort (no TMRE), cells were stained with CFSE and DAPI, and we used FACS to  
683 obtain a population of viable cells the same CFSE signal. We then grew cells for 3 or 5 days,  
684 and every 24 hours measured the CFSE signal using flow cytometry. Staining did not have a  
685 strong effect on cell viability or proliferation (**Figure S7**).

686

687 For the TMRE sort for proliferation rate, cells were stained with CFSE and TO-PRO-3, and we  
688 used FACS to obtain a population of G1 cells with the same CFSE signal. We then grow cells  
689 for 3 or 5 days, and every 24 hours measured the CFSE signal using flow cytometry.

690

691 In order to have a homogeneous starting population, both cell types were stained with  
692 Hoechst (10 ug/ml, Life Technologies) to pick cells in G0/G1 phase. Within this population,  
693 cells were selected according to the proliferation rate on the peak of CFSE signal prior to  
694 staining them with the dye. Then cells were sorted by TMRE into three bins: low, medium  
695 and high with a BD Influx cell sorter into prechilled 1.5 ml Eppendorf tubes containing 200  $\mu$ l  
696 medium each. Cells were then centrifuged at 1000 rpm for 5 min, the cell pellet was washed  
697 with PBS and used for RNA extraction. All bins were treated identically throughout the  
698 process. Cellular RNA was extracted using the Maxwell RNA Purification Kit and processed for  
699 RNA sequencing. Cell viability was determined by TO-PRO-3 (Thermo Fisher Scientific)  
700 staining.

701

702 To test the effect of O<sub>2</sub> levels and ascorbic acid/vitamin C in both cell types, sorted cells from  
703 each bin were plated into each of the four different conditions (low O<sub>2</sub> (5%), normal oxygen



704 growing conditions, and with or without ascorbic acid/vitamin C (25 ug/ml, Sigma-Aldrich))  
705 in duplicate. After one day of recovery from the sorting, the cells were washed in PBS, were  
706 trypsinized, and counted. After seeding the same initial number, the rest of the cells was  
707 analyzed on a BD Fortessa analyzer. Every day a sample from each condition and replicate  
708 was taken for counting, and stained with 50 nM TMRE, up to 3 days for ESCs and 5 days for  
709 fibroblasts, and both TMRE and CFSE were measured by flow cytometry.

710

711 Images of CFSE and TMRE stained cells are shown in **Figures S8** and **S9**.

712

### 713 **Gene set enrichment analysis (GSEA)**

714 GSEA was performed using the GSEA software and the MSigDB (Molecular Signature  
715 Database v6.2)[88, 89]. We use signal-to-noise (requires at least three replicates) or log2  
716 ratio of classes (for experiments with less than three replicates) to calculate the rank of each  
717 gene. The maximum number of genes in each gene set size was set to 500, the minimum to  
718 15, and GSEA was run with 1000 permutations. We provided all GSEA results in this study  
719 (**Table S8**).

720

### 721 **Enrichment map**

722 Enrichment map of this study (Figure 3C, D and Figure 6B, C) are created using  
723 EnrichmentMap in Cytoscape[90, 91], we refer to Reimand et al's protocol[92] for using  
724 EnrichmentMap.

725 We imported the output file of GSEA to EnrichmentMap and set FDR threshold as 0.1, other  
726 parameters set as default.

727

### 728 **Coordination of expression of ribosome biogenesis and proteasome related genes**

729 We first calculate the mean expression (average of  $\log_2(\text{TPM}+1)$ ) of ribosome biogenesis  
730 genes (genes in GO preribosome gene set) and proteasome genes (genes in GO proteasome  
731 complex gene set) across organ developmental time course, then we calculate the Pearson  
732 correlation of ribosome biogenesis and proteasome.

733

### 734 **Calculation of proliferation signature scores**

735 To obtain proliferation correlated genes, we first calculate, for each gene, the Spearman  
736 correlation with proliferation rate, as measured by the decrease in CFSE signal, in both  
737 fibroblasts and ESCs. We define "proliferation correlated genes" as genes that have a  
738 correlation of 1 in both fibroblasts and ESCs (243 genes). To this set we add genes from six  
739 ribosome biogenesis and proteasome related gene sets that are significantly enriched in  
740 both fibroblasts and ESCs, which result in a final gene set consisting of 370 genes (**Table S3**)  
741 and we called this gene set proliferation signature.

742 To apply proliferation signature in other species, the R package Biomart[93, 94] was used to  
743 obtain homologous genes of other species in this study and to map across different gene  
744 naming schemes (eg: transfer Ensemble gene id to Entrez gene id).

745

### 746 **Prediction of growth rates using proliferation signature**

747 Published expression profiling data for yeasts cultured in the chemostat with controlled  
748 growth rate from Airoidi et al. (dataset1)[95], Slavov et al. (dataset2)[96], Regenberg et al.  
749 (dataset3)[13] and cancer cell lines with corresponding growth rate[63] were downloaded.  
750 For each dataset, we used ssGSEA to calculate the enrichment score of a gene set containing  
751 all proliferation signature genes, and calculated the Pearson correlation of proliferation  
752 signature score with growth rate. ssGSEA[97] is a rank-based method that computes an  
753 overexpression measure for a gene set of interest relative to all other genes in the genome.  
754 We use R package GSVA to apply ssGSEA with default settings[98].  
755 We also used another method to calculate proliferation signature score for 3 yeast datasets.  
756 We use the sum of genes expression for all genes in the proliferation gene set to represent  
757 proliferation signature score (**Figure S3D-F**), the result is slightly worse than the ssGSEA  
758 method.

759

#### 760 **Proliferation score of 2C-like mESCs and non-2C-like mESCs**

761 RNA-seq data (GSE33923) of 2C-like mESCs are from Macfarlan et al.[64], who FACS  
762 separated 2C-like cells (high MuERVpromoter driven expression, 2C::tdTomato<sup>+</sup>) from  
763 non-2C-like mESCs (2C::tdTomato<sup>-</sup>). We calculated the proliferation signature score for each  
764 of the six samples, and used a paired t-test to control for differences between replicates.

765

#### 766 **Brief description of experiments from other papers**

767 In van Dijk et al.[8] *cts1Δ* histone-GFP budding yeast undergo cytokinesis to separate mother  
768 and daughter cells, but these cells remain physically attached to each other by their cell wall.  
769 Thus, starting from an initial population of single cells in G1, variation in proliferation rate  
770 can be measured by variability in histone-GFP signal in physically connected clusters of cells.  
771 Each cluster contains cells descended from the same ancestor cell.

772 In Dhar et al.[9] wild-type yeast were stained with TMRE, and sorted into four bins with  
773 varying TMRE signal.

774 In Sukumar et al.[21] pmel-1 T cell receptor (TCR) transgenic mice were injected with  
775 recombinant vaccinia virus encoding hgp100 (gp100-VV). Five days after vaccination, they  
776 isolated CD8<sup>+</sup> T cells, stained them with the lipophilic cationic dye tetramethylrhodamine  
777 methyl ester (TMRM) (25 nm for 30 min at 37°C) and FACS-sorted the highest and lowest  
778 7-10% of cells for subsequent RNA-seq.

779

#### 780 **Proliferation scores of preterminal cell lineages vs terminal cell types**

781 Preterminal cell lineage and terminal cell type pseudo-bulk RNAseq data of *C.elegans* were  
782 downloaded from Murray et al.[66], specifically, gene expression profile for terminal cell  
783 types and preterminal cell lineage is in Table S7 and Table S8, annotation file for terminal cell  
784 types and preterminal cell lineage is in Table S2 and Table S4. As there are multiple time  
785 points for one terminal cell type, we only use the sample with maximum time point to  
786 represent corresponding terminal cell type, processed data provided in this study (**Table S9**).  
787 For each cell we calculate proliferation signature score, and a t-test was used to compare the  
788 mean proliferation signature score of all cells in each of the two groups.

789

#### 790 **C. elegans scRNA-seq data analysis**

791 *C. elegans* scRNA-seq data was provided in R package “VisCello.celegans”. After loading the  
792 package, type cello() to load all data into the current environment. We calculated the  
793 proliferation signature score for all single cells, then color them by proliferation signature  
794 score in UMAP space. The calculation of proliferation signature score for single cell data is  
795 different from the calculation for bulk RNA-seq data. We just sum up the expression value of  
796 genes in proliferation signature gene set to get proliferation signature score, but not use  
797 ssGSEA consider ssGSEA is a rank-based method, however most of the genes have 0  
798 expression in this scRNA-seq data set (**Figure S4A**), which makes it not appropriate to use  
799 ssGSEA.

800 We binned all single cells by their embryo time. We first calculate the mean proliferation  
801 score for cells with same embryo time, then calculate Spearman correlation of this mean  
802 proliferation score with embryo time, the result is  $\rho = -0.65$  ( $p = 9.3 \times 10^{-19}$ ), the correlation  
803 of unbinned data is  $-0.41$  ( $p < 2.2 \times 10^{-16}$ ). After excluding three special cell types germline, M  
804 cell and intestine, the result is  $\rho = -0.73$  ( $p = 8.6 \times 10^{-24}$ ), the correlation of unbinned data is  
805  $-0.45$  ( $p < 2.2 \times 10^{-16}$ ).

806

### 807 **Experimental data for *C. elegans* development**

808 Developmental data of *C. elegans* was extracted from figure 4 of Sulston et al.[67]. This  
809 figure is cell number (live nuclei number) change over embryo time and we use  
810 WebPlotDigitizer[99] to extract data. We use the data to plot log2 cell number change over  
811 embryo time. The difference of log2 cell number for two adjacent time points divided by the  
812 difference of time is the proliferation rate of mean of two time points.

813

814

### 815 **DATA AND CODE AVAILABILITY**

816 The code for performing analysis is available at  
817 [https://github.com/carey-lab/Proliferation\\_Signature\\_Public](https://github.com/carey-lab/Proliferation_Signature_Public). Raw and processed RNA-seq  
818 data created in this study are available on GEO (Gene Expression Omnibus) with the  
819 accession code GSE139594. Information of all published data used in this study is provided  
820 (**Table S10**).

821

### 822 **AUTHOR CONTRIBUTIONS**

823 Z.J. and S.F.G. made the figures. Z.J. and M.B. analyzed the data. S.F.G. and M.B. did the  
824 experiments. L.B.C. and B.P. supervised the project. L.B.C., Z.J., S.F.G. and B.P. wrote the  
825 manuscript. All authors read and approve of the final manuscript.

826

### 827 **ACKNOWLEDGMENTS**

828 We thank the CRG/UPF flow-cytometry core and CRG Genomics facilities for help with  
829 experiments, and Yang Zhao for comments on the manuscript.

830 This work has been funded by the Spanish Ministry of Science, Innovation and Universities  
831 (BFU2014-55275-P and BFU2017-88407-P to B.P. and BFU2015-68351-P to L.B.C.), the AXA  
832 Research Fund and the Agencia de Gestio d’Ajuts Universitaris i de Recerca (AGAUR, 2017  
833 SGR 346 to B.P. and 2014 SGR 0974 & 2017 SGR 1054 to L.B.C.), the National Natural Science  
834 Foundation of China (31950410537 to L.B.C.). We would like to thank the Spanish Ministry of

835 Economy, Industry and Competitiveness (MEIC) to the EMBL partnership, to the ‘Centro de  
 836 Excelencia Severo Ochoa’, and the Unidad de Excelencia María de Maeztu, funded by the  
 837 MINECO (MDM-2014-0370). We also acknowledge the support of the CERCA Programme of  
 838 the Generalitat de Catalunya. L.B.C. was supported by funding from Peking University and  
 839 from the Peking-Tsinghua Center for Life Sciences, and from the Research Fund for  
 840 International Young Scientists (National Natural Science Foundation of China).

841

842

843

844

845 **FIGURE LEGENDS AND TABLE**

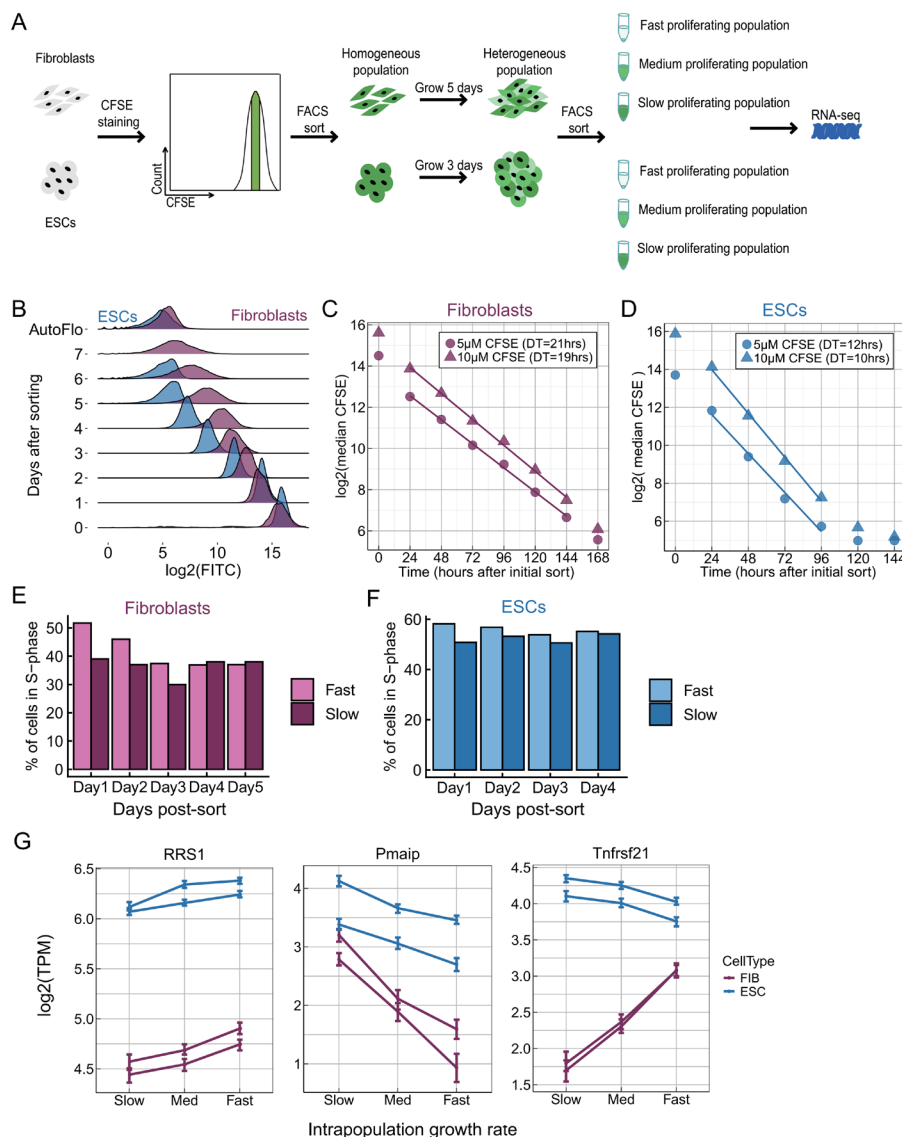

846

847 **Figure 1. A CFSE-based method to sort mammalian cells by proliferation rate.**

848 **(A)** Cells were stained with CFSE and a subpopulation of cells with identical CFSE levels was  
 849 collected by FACS. Growth for several generations resulted in a heterogeneous cell  
 850 population with a broad CFSE distribution, and cells with high, medium, and low CFSE signal

851 (slow, medium and fast proliferation, respectively) were sorted by FACS for RNA-sequencing.  
852 **(B)** The change in the CFSE distribution over time, for fibroblasts and ESCs. **(C, D)** The  
853 population-level doubling time can be calculated by fitting a line to the median of the  
854 log<sub>2</sub>(CFSE) signal. We discard data from time 0, cells immediately after the sort, because  
855 the CFSE signal decreases in the initial hours, even in the absence of cell division, likely due  
856 to efflux pumps. **(E, F)** BrdU was used to measure the % of cells in S-phase for FACS-sorted  
857 fast and slow proliferating subpopulations. Fibroblasts: 4 replicates,  $p = 0.0002441$ . ESCs: 3  
858 replicates for ESCs,  $p = 0.001953$ .  $p$ -values are for binomial tests across all biological  
859 replicates that the two populations have the same percentage of cells in S-phase. **(G)**  
860 Examples of genes whose expression positively or negatively correlated with proliferation  
861 rate. Each line is one biological replicate, and the error bars are 95% confidence intervals for  
862 each expression value.  
863

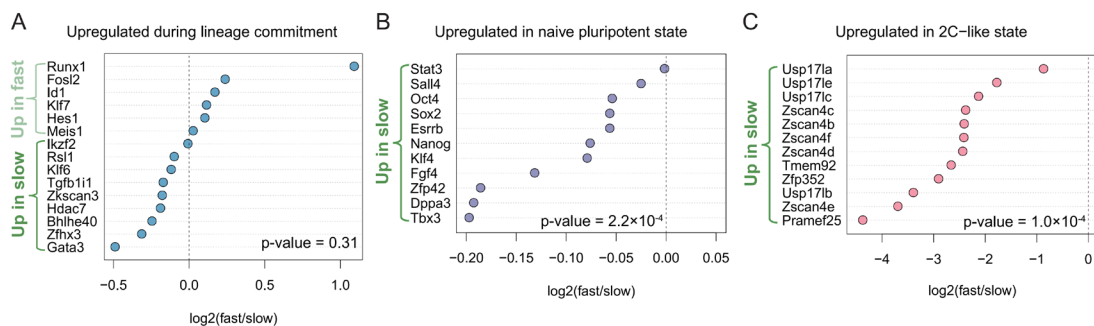

864

865 **Figure 2. Slow-proliferating ESCs display a more naive pluripotent stemness character than**  
866 **fast-proliferating ESCs.**

867 **(A)** Comparison of lineage commitment-related gene expression between fast and slow  
868 proliferating subpopulations. **(B)** Comparison of pluripotency-associated gene expression  
869 between fast and slow proliferating subpopulations. **(C)** Comparison of 2C-like state markers  
870 expression between fast proliferating subpopulation and slow proliferating sub-population.  
871 Dashed lines separate genes expressed preferentially in slow- (left of dashed line) or in  
872 fast-proliferating (right of dashed line) ESCs.  $P$ -values are from binomial tests, testing if genes  
873 are more often highly expressed in slow cells than would be expected by chance (53.5% of all  
874 genes are more highly expressed in slow cells).  
875

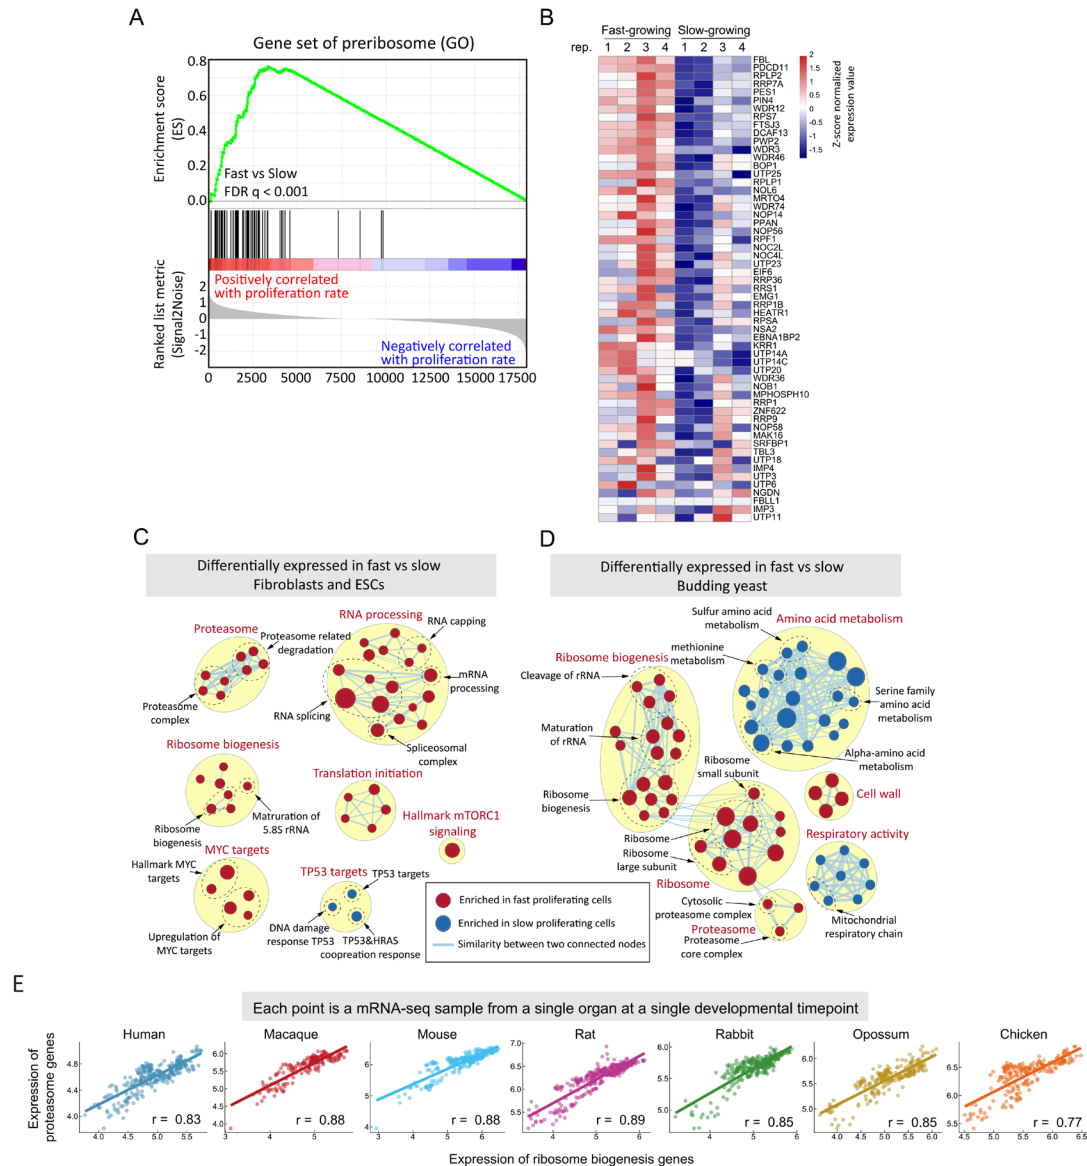

876

877 **Figure 3. Functional pathways for which cell-to-cell heterogeneity in expression correlates**  
 878 **with proliferation rate across cell types and species.**

879 **(A)** In Gene Set Enrichment Analysis, genes are sorted by their fast/slow expression value  
 880 (left panel, bottom), and each gene is represented by a single black line (left panel middle).  
 881 The enrichment score is calculated as follows: for each gene not in the GO preribosome gene  
 882 set, the value of the green line decreases, and for each gene in the gene set, the value of the  
 883 green line increases. The ES score will be near zero if the genes in a gene set are randomly  
 884 distributed across the sorted list of genes, positive if most genes are to the left, and negative  
 885 if most genes are to the right. **(B)** The heatmap (right panel) shows the expression (z-scored  
 886 read counts) of preribosome genes in fibroblasts across four biological replicates of the CFSE  
 887 sorting experiment. **(C)** Gene sets enriched (FDR<0.1) in both fibroblasts and ESCs were  
 888 mapped as a network of gene sets (nodes) related by mutual overlap (edges), where the  
 889 color (red or blue) indicates if the gene set is more highly expressed in fast (red) or slow  
 890 proliferating cells. Node size is proportional to the total number of genes in each set and  
 891 edge thickness represents the number of overlapping genes between sets. **(D)** GSEA results



892 (FDR<0.1) of *S. cerevisiae*[8] that sorted by cell-to-cell heterogeneity in proliferation rate. (E)  
893 Pearson correlations of mean expression (average of  $\log_2(\text{TPM}+1)$ ) of ribosome biogenesis  
894 genes vs proteasome genes across organ developmental time courses in seven species (see  
895 also Figure S1).  
896

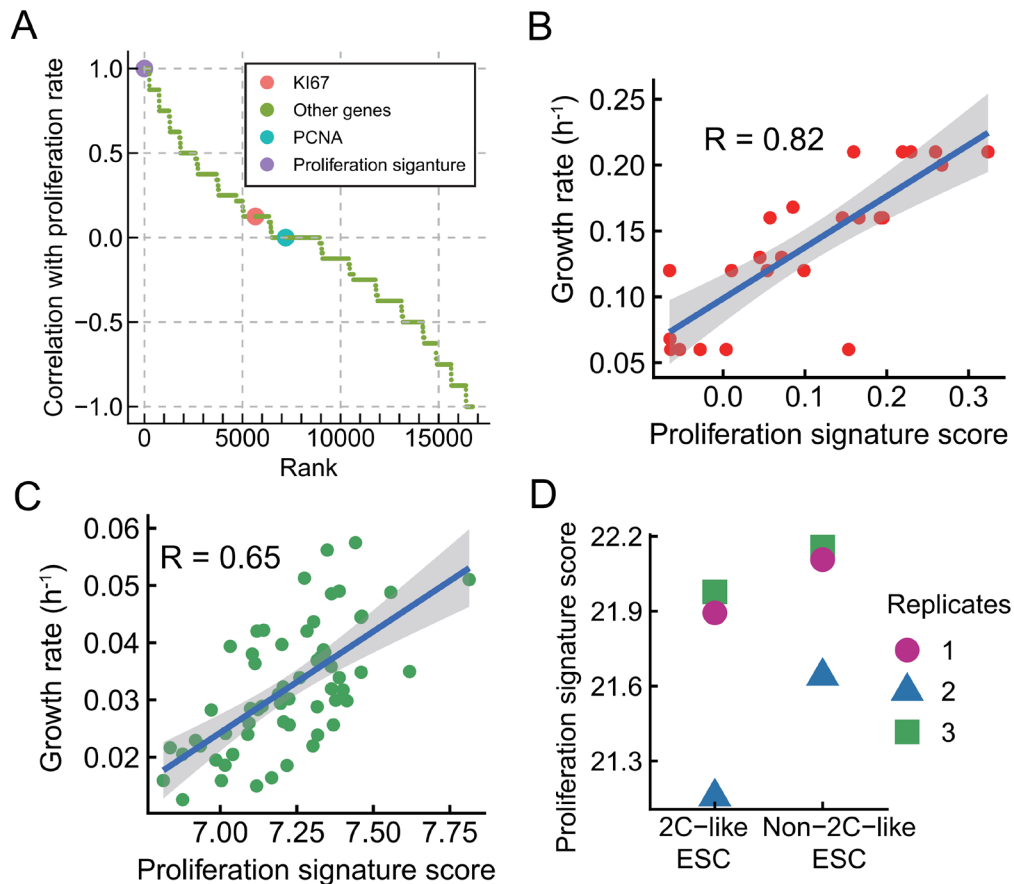

897  
898 **Figure 4. A proliferation signature model can predict relative growth rates from gene**  
899 **expression for species and cell-types on which it was not trained.**  
900 (A) Genes and proliferation signature spearman correlation with proliferation rate (sorted by  
901 CFSE). Compare with Ki67 or PCNA, proliferation signature has a better correlation with  
902 proliferation rate. (B) Using the proliferation signature to predict growth rate in budding  
903 yeast, we apply ssGSEA to calculate the enrichment score of proliferation signature for each  
904 sample. The Pearson correlation of proliferation signature score with growth rate is 0.82 ( $p =$   
905  $8.9 \times 10^{-7}$ ). (C) Using the proliferation signature to predict growth rate in cancer cell lines, the  
906 Pearson correlation is 0.65 ( $p = 1.9 \times 10^{-8}$ ). (D) Comparison of proliferation signature score  
907 between 2C-like ESC and non-2C-like ESC (paired t-test,  $p = 0.04669$ ).  
908

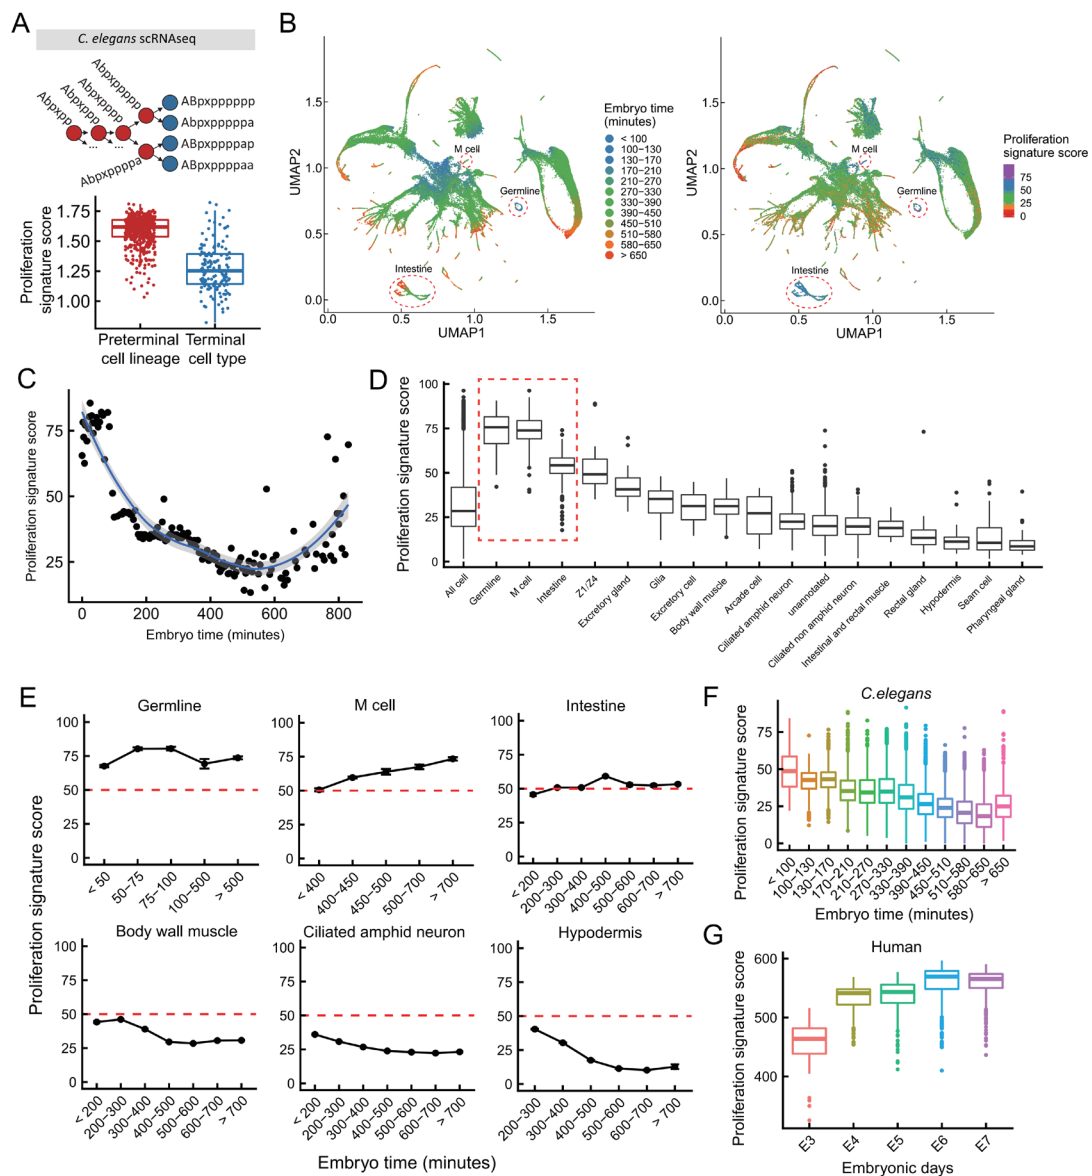

909

910

**Figure 5. Proliferation signature of cell development.**

911

**(A)** A cartoon showing four terminal cells, and a partial lineage showing the final four

912

generations of preterminal cells. Comparison of single-cell proliferation signatures between

913

preterminal cell lineage and terminal cell types (t-test,  $p = 4.9 \times 10^{-41}$ ). **(B)** UMAP projection of

914

89,701 cells. Cells in the left panel are colored by estimated embryo times; in the right panel

915

by proliferation signature score. **(C)** To calculate the proliferation signature score (y-axis) at

916

each time point (x-axis) cells are binned by embryo time, and the mean proliferation

917

signature score for all cells in the same bin is calculated. The spearman correlations are -0.65

918

( $p = 9.3 \times 10^{-19}$ ) for binned data and -0.42 ( $p < 2.2 \times 10^{-16}$ ) for unbinned data. **(D)** Boxplots (line

919

shows median, boxes interquartile range) of proliferation signature score for all cells with

920

embryo time > 650min. **(E)** Temporal dynamics of proliferation scores of select cell lineages,

921

showing the average proliferation score for all single cells in that lineage, at each time point.

922

**(F-G)** Boxplot of *C. elegans* **(F)** and human **(G)** proliferation signatures as a function of

923

developmental time, from scRNAseq data.

924

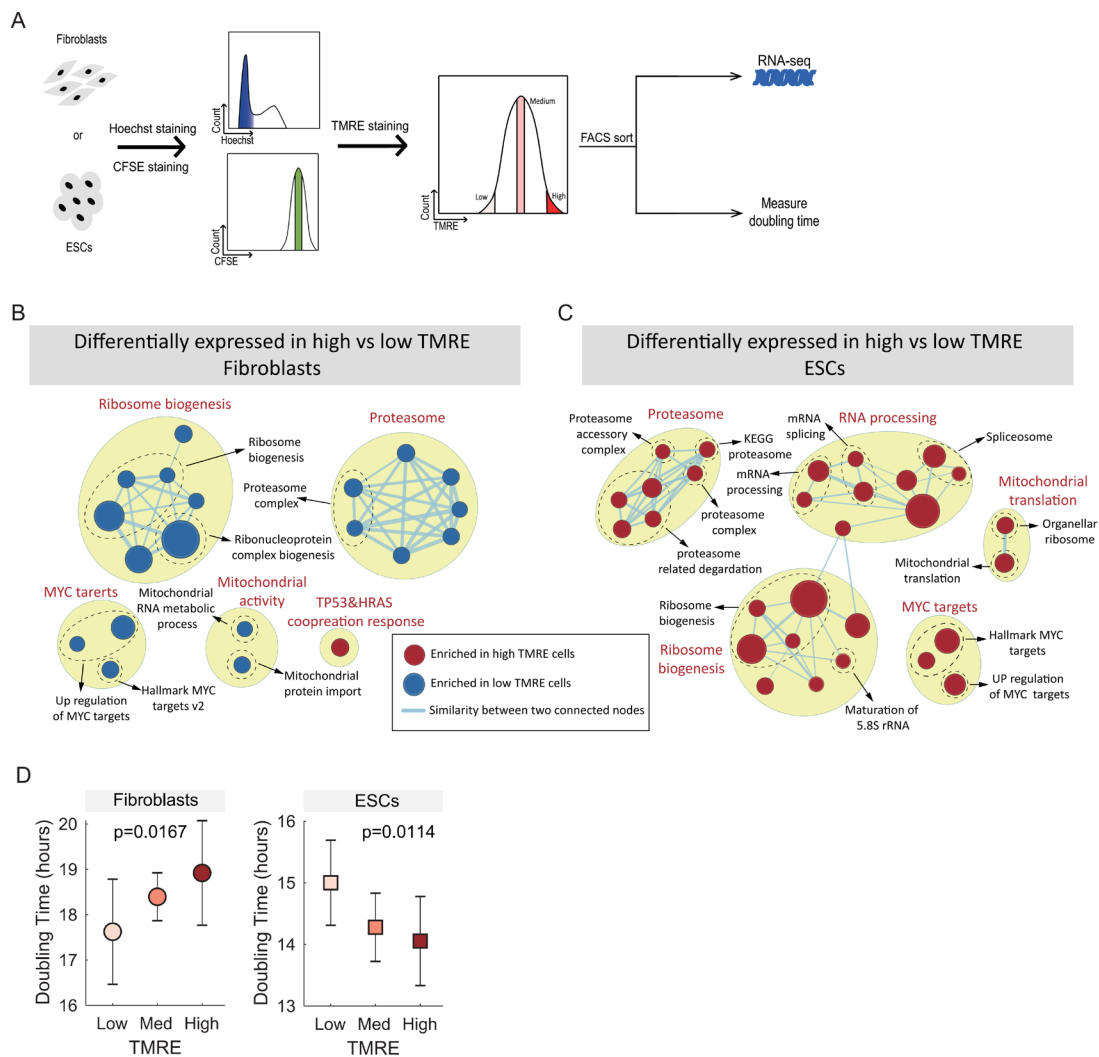

925

926

**Figure 6. Expression of proliferation-related gene sets in cells sorted by intra-population heterogeneity in mitochondria membrane potential.**

927

928

929

930

931

932

933

934

935

936

**(A)** Cells were stained with Hoechst and CFSE and a homogenous population of equally sized cells in G1 with equal CFSE was obtained by FACS. These cells were stained with TMRE sorted by TMRE, and then used for RNA-seq, or allowed to proliferate to measure the doubling time of each TMRE sub-population. **(B, C)** Enrichment maps of fibroblasts and ESCs sorted by TMRE. **(D)** Doublings times, as estimated by the measured by the decrease in CFSE signal over time, for high, medium and low TMRE sorted cells. P-values are from ANOVA, testing if TMRE is predictive of doubling time (see methods).

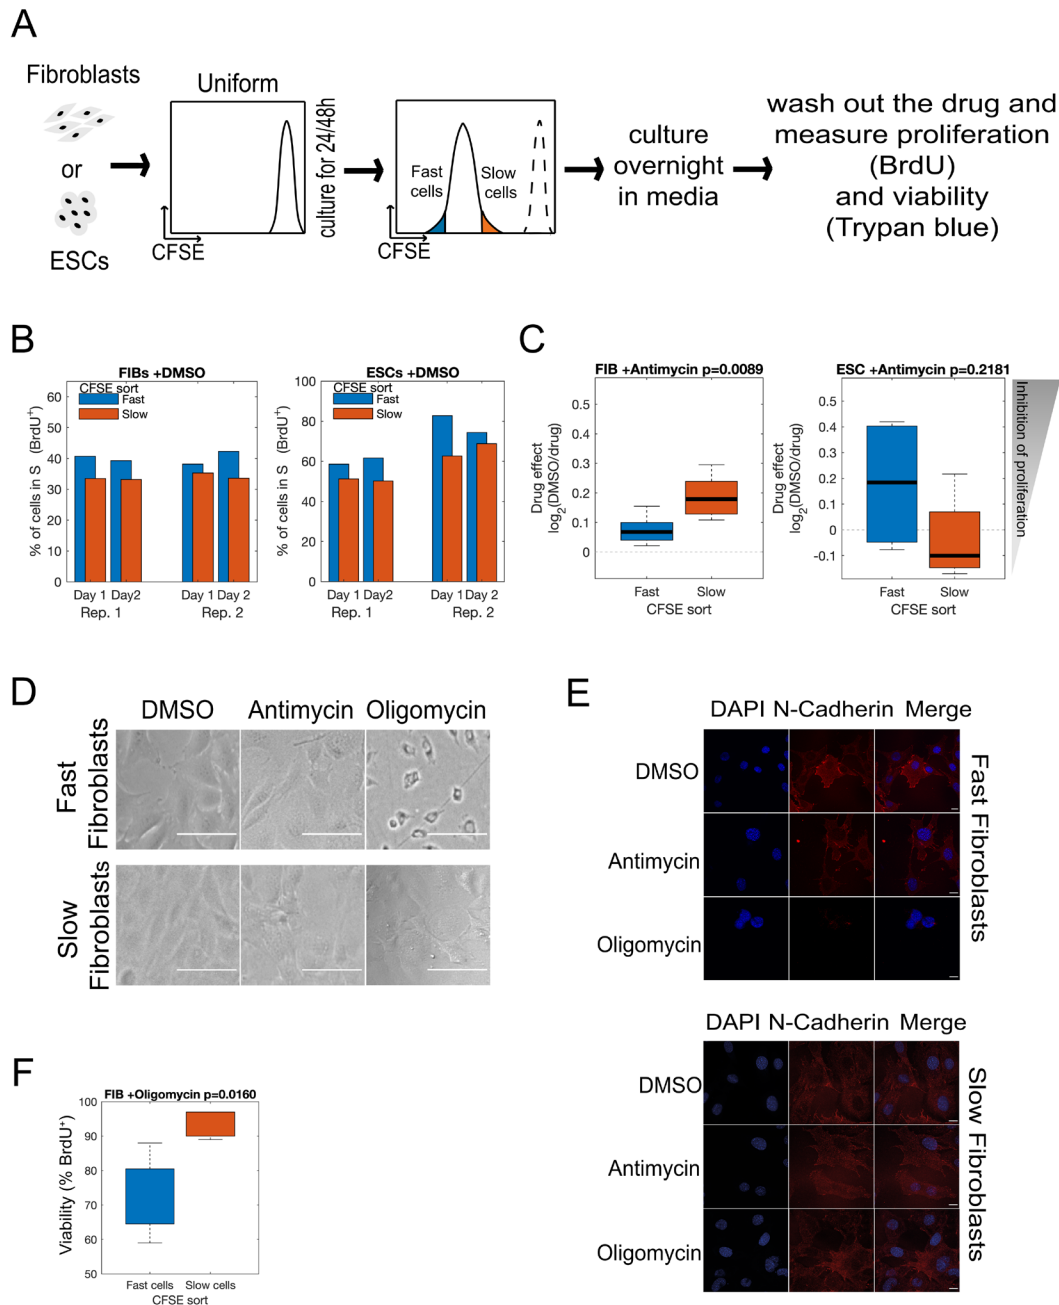

937

938

939

940

941

942

943

944

945

946

947

948

949

**Figure 7. Growth-rate and cell-type specific effects of mitochondria inhibitors on proliferation rate, cell viability and cell state. (A)** Schematic of the experimental setup for measuring the effects of mitochondria inhibitors on slow and fast proliferating cells. **(B)** Fast proliferating Fibroblast and ESCs sorted by CFSE signal maintained a higher fraction of cells in S phase over two days of growth in media+DMSO. **(C)** Effect of antimycin treatment on fast and slow proliferating fibroblasts and ESCs. **(D)** Fast fibroblasts changed morphology after the treatment with oligomycin. Scale bars = 80µm. **(E)** Immunostaining of fibroblasts for N-Cadherin and DAPI after drug treatment. Fast fibroblasts lose N-Cadherin staining specifically after oligomycin treatment. Scale bars = 15µm. **(F)** Effect of oligomycin and antimycin treatment on fibroblast viability. Oligomycin has a specific effect on the viability of fast-proliferating fibroblasts.

950

951 **Table 1. Gene sets whose expression exhibits opposite correlations with growth between**  
 952 **fibroblasts and ESCs.** Shown are representative gene sets whose expression is significantly  
 953 correlated with proliferation in either fibroblasts or ESCs, but whose expression changes with  
 954 proliferation in opposing directions.

955

956 SUPPLEMENTAL FIGURE LEGENDS

957

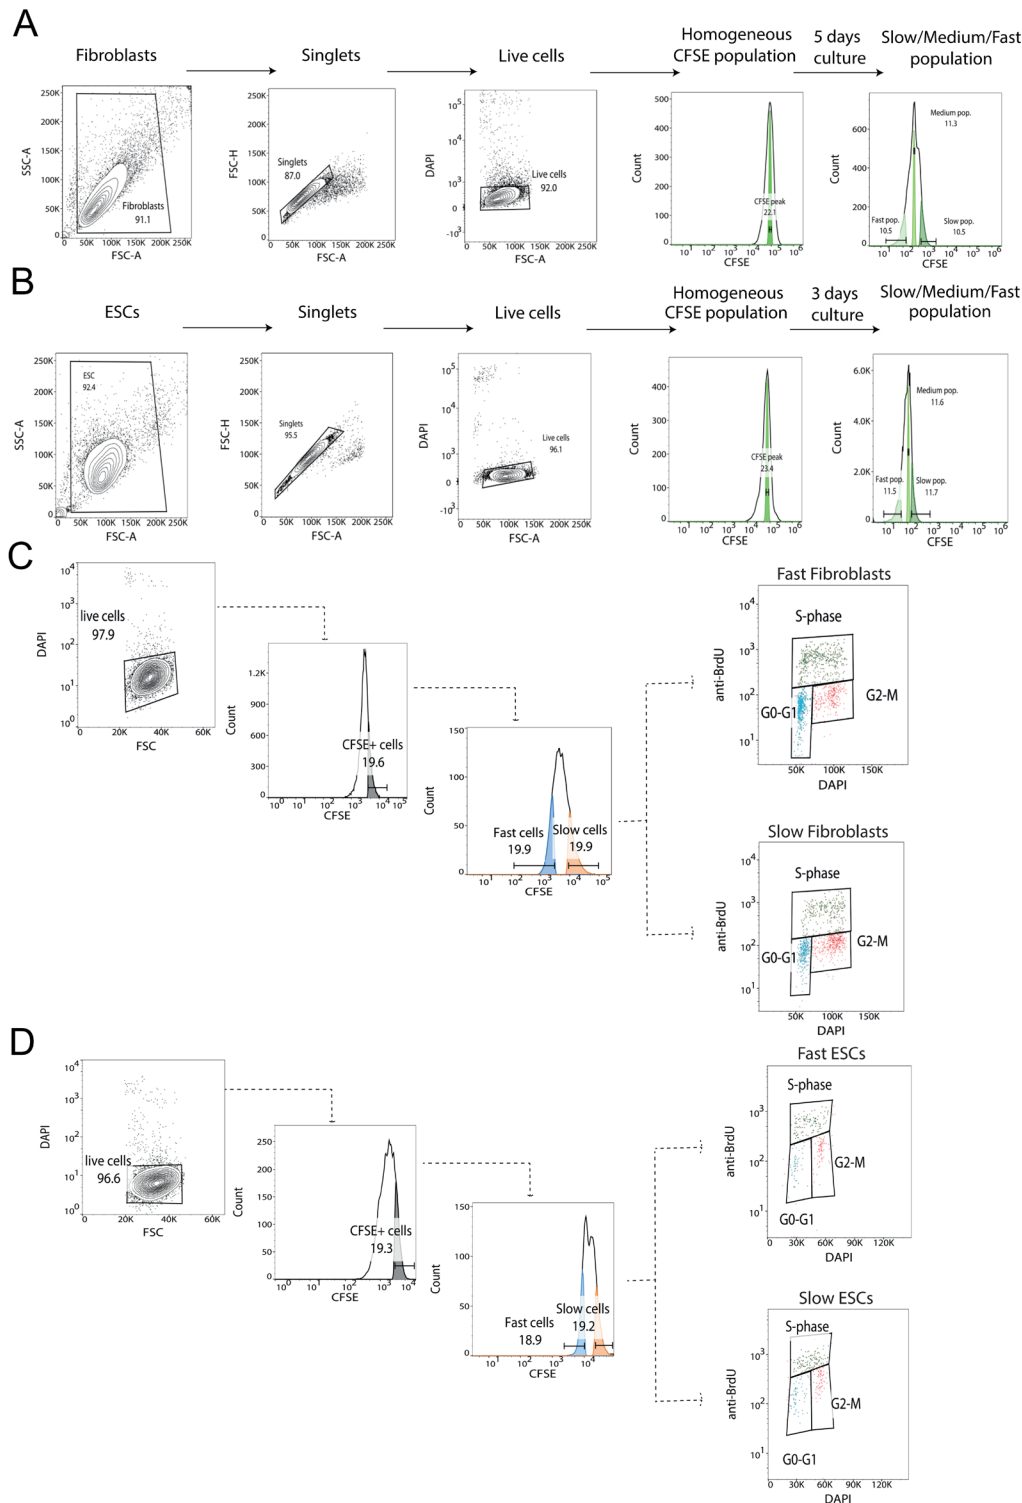

958

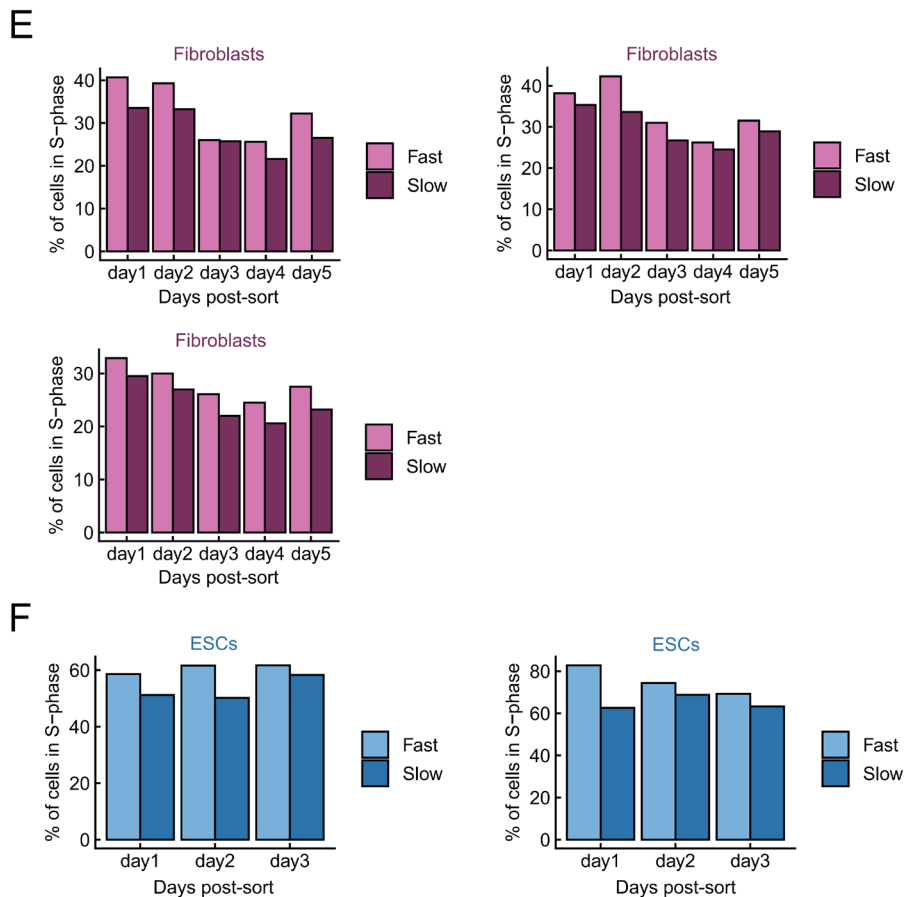

959

960 **Figure S1. Fast proliferating subpopulations maintain higher proliferation rates than slow**  
 961 **proliferating subpopulations for at least 3 days.**

962 **FACS gating strategy for CFSE staining to get cell subpopulations with different proliferation**  
 963 **rates.**

964 **(A, B)** The gating strategy for CFSE staining to get cell subpopulations with different  
 965 proliferation rates in fibroblasts **(A)** and in ESCs **(B)**. Slow, medium and fast proliferating cell  
 966 subpopulations were sorted by FACS according to their CFSE signal. Then RNA-seq was  
 967 performed on each of the three subpopulations. **(C, D)** FACS gating strategy for measuring  
 968 the heritability of proliferation rates. The gating strategy for measuring the heritability of  
 969 proliferation rates in fibroblasts **(C)** and in ESCs **(D)**. In all experiments, the laser voltage was  
 970 increased so that, when sorting high and low CFSE cells, the modal CFSE signal was at least  
 971  $10^3$ ; the voltage is not the same for the first and second CFSE sorts. **(E)** 3 Replicates of  
 972 fibroblasts that similar to figure 1E. **(F)** 2 Replicates of ESCs that similar to figure 1F.

973



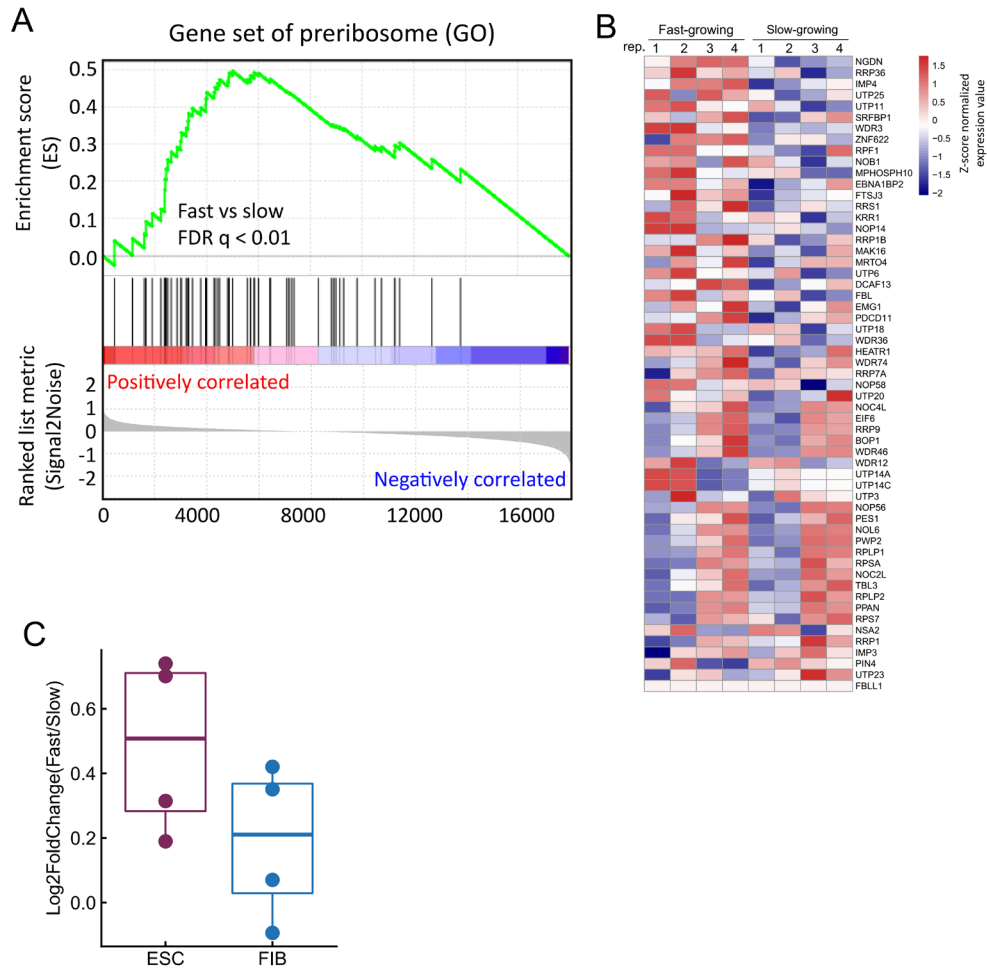

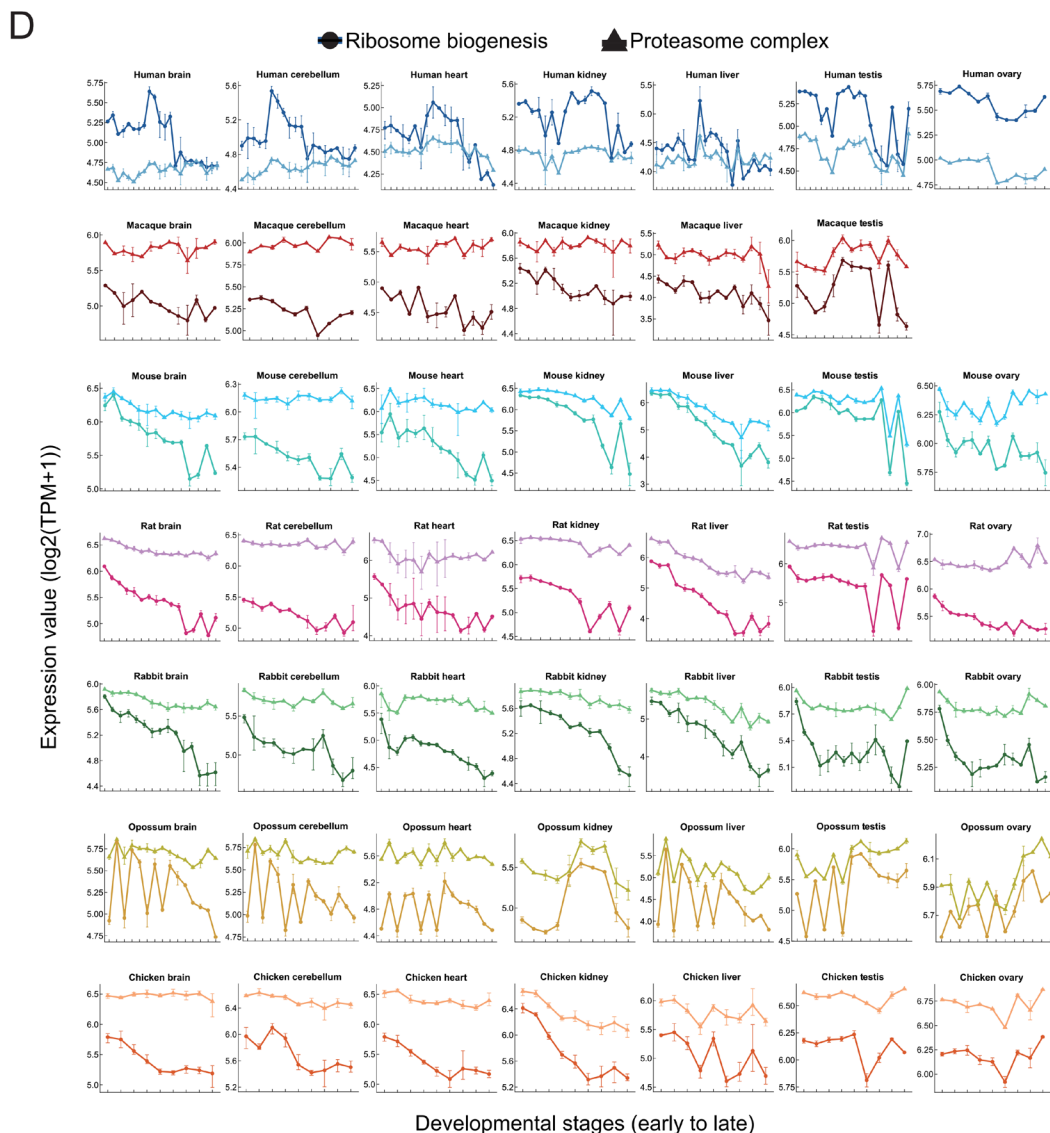

975

976 **Figure S2. Functional pathways for which cell-to-cell heterogeneity in expression correlates**  
 977 **with proliferation rate across cell types and species.**

978 **(A)** GSEA result plot of Go preribosome genes set for ESC. **(B)** The heatmap (right panel)  
 979 shows the expression (z-scored read counts) of preribosome genes in ESCs across four  
 980 biological replicates of the CFSE sorting experiment. **(C)** Higher expression of Myc in both fast  
 981 proliferating ESCs and fibroblasts. log<sub>2</sub> fold change of Myc expression between fast and slow  
 982 proliferating subpopulation in both ESCs and fibroblasts, each cell type 4 replicates. **(D)**  
 983 Correlated changes in the expression of ribosome biogenesis and proteasome related genes  
 984 during organ development. Change of average expression of log<sub>2</sub>(TPM+1) of genes in  
 985 ribosome biogenesis (Go preribosome) gene set and proteasome complex (Go proteasome  
 986 complex) gene set with developmental stages across different organs in seven species[16].  
 987 Points (circle and triangle) are the mean expression of replicates, error bars represent the  
 988 maximum and minimum value in the replicates.

989

990

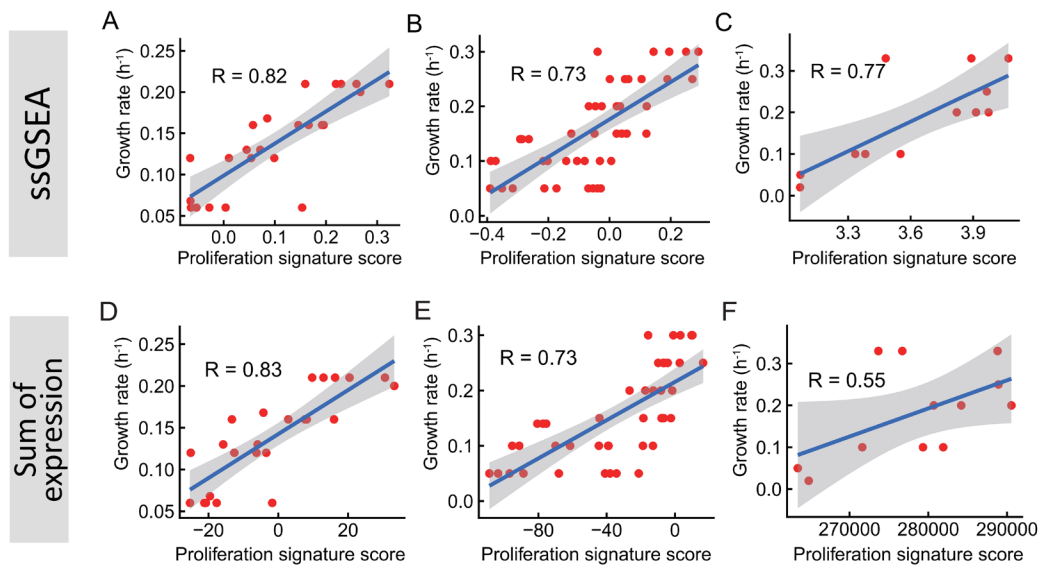

991

992 **Figure S3. Proliferation signature scores predict growth rate, using different methods of**  
993 **calculation, and different species.**

994 **(A-C)** Using the Normalized Enrichment Score from ssGSEA to predict growth rate in three  
995 different data sets. The Pearson correlation of proliferation signature score with growth rate  
996 in are  $R = 0.82$  ( $p = 8.9 \times 10^{-7}$ ),  $R = 0.73$  ( $p = 1.3 \times 10^{-8}$ ) and  $R = 0.77$  ( $p = 3.7 \times 10^{-3}$ ). **(D-F)** Similar  
997 to figure A-C, but using the sum of expression values for all genes in the proliferation  
998 signature gene set to calculate proliferation signature score. The Pearson correlation of  
999 proliferation signature score with growth rate are  $R = 0.83$  ( $p = 7.0 \times 10^{-7}$ ),  $R = 0.73$  ( $p =$   
1000  $1.6 \times 10^{-8}$ ) and  $R = 0.55$  ( $p = 0.65 \times 10^{-2}$ ).  
1001

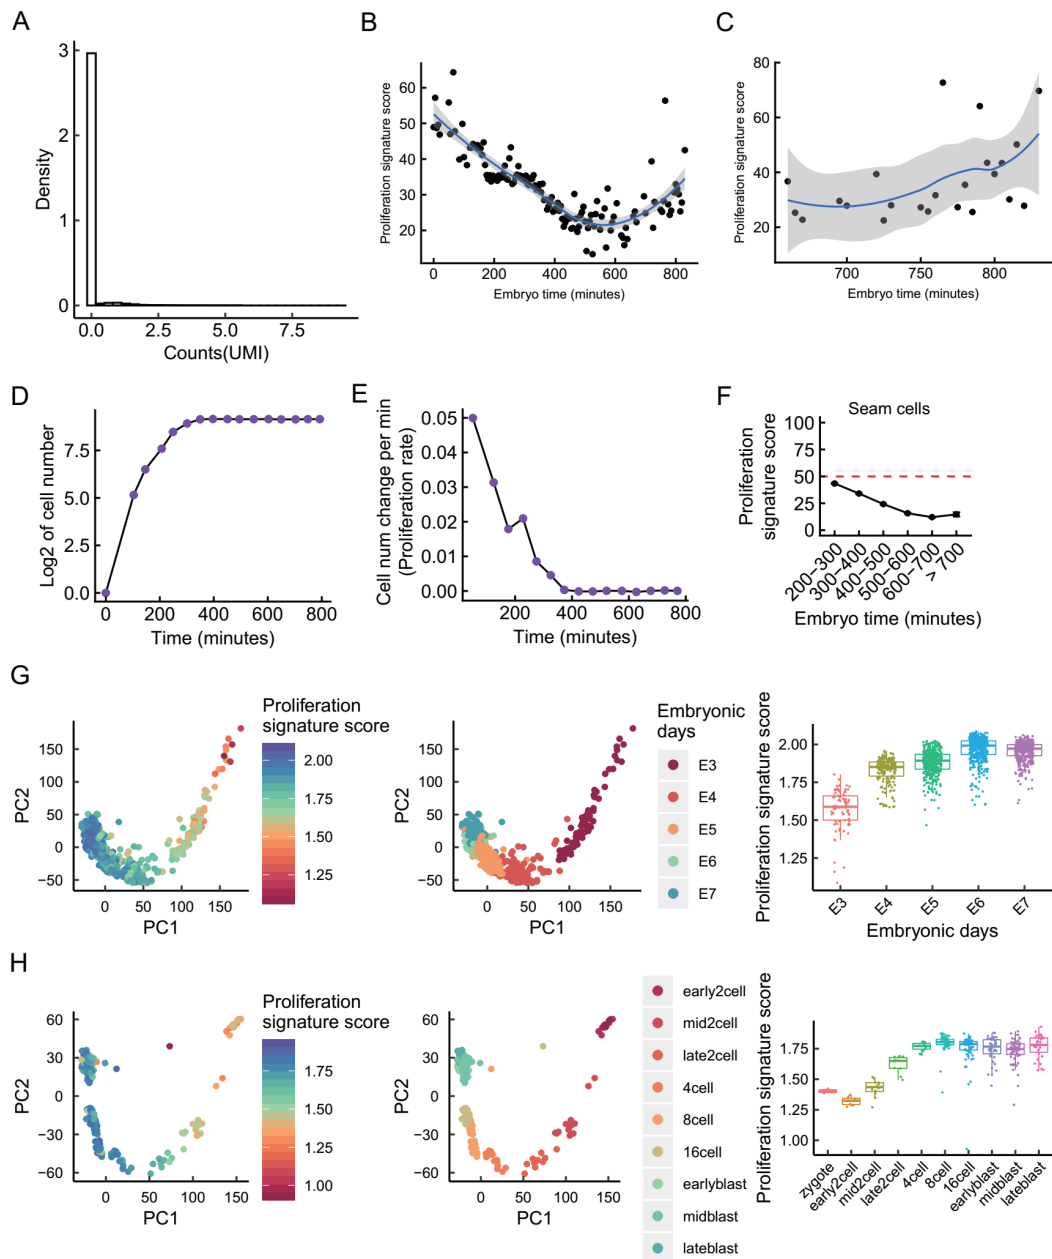

1002

1003

1004

**Figure S4. Lineage-specific proliferation signature scores during *C. elegans* development.**

1005

**(A)** A density histogram of counts (UMI) across 1000 randomly sampled cells; 95.6% of genes

1006

have zero reads. This causes ssGSEA to give unreliable results, so the sum of expression

1007

values method is used for calculating the proliferation signature score for single cells. **(B)**

1008

Cells are binned by embryo time, and the mean proliferation signature score for all cells not

1009

the three outlier cell types (germline, intestine and M cells). The Spearman correlation is  $\rho = -0.73$  ( $p = 8.7 \times 10^{-24}$ ) for binned data, and  $\rho = -0.45$  ( $p < 2.2 \times 10^{-16}$ ) for unbinned data. **(C)**

1010

Similar to figure 5C, but only showing cells with an age higher than 650 minutes,  $\rho = 0.5$  ( $p = 1.5 \times 10^{-2}$ ).

1011

**(D, E)** The change in cell number, and the rate of change in cell number, during

1012

development, as measured by microscopy[67]. **(F)** Change in proliferation signature score for

1013

1014 seam cells, which form multinucleated cells through cell-fusion. **(G)** Single-cell gene  
1015 expression data from Petropoulos et al.[69] projected onto the first two principal  
1016 components and colored by proliferation signature score or developmental stages. And  
1017 boxplot shows the change of proliferation signature score with developmental stages. **(H)**  
1018 Similar to figure G, but use scRNA-seq data from Deng et al.[70].  
1019  
1020

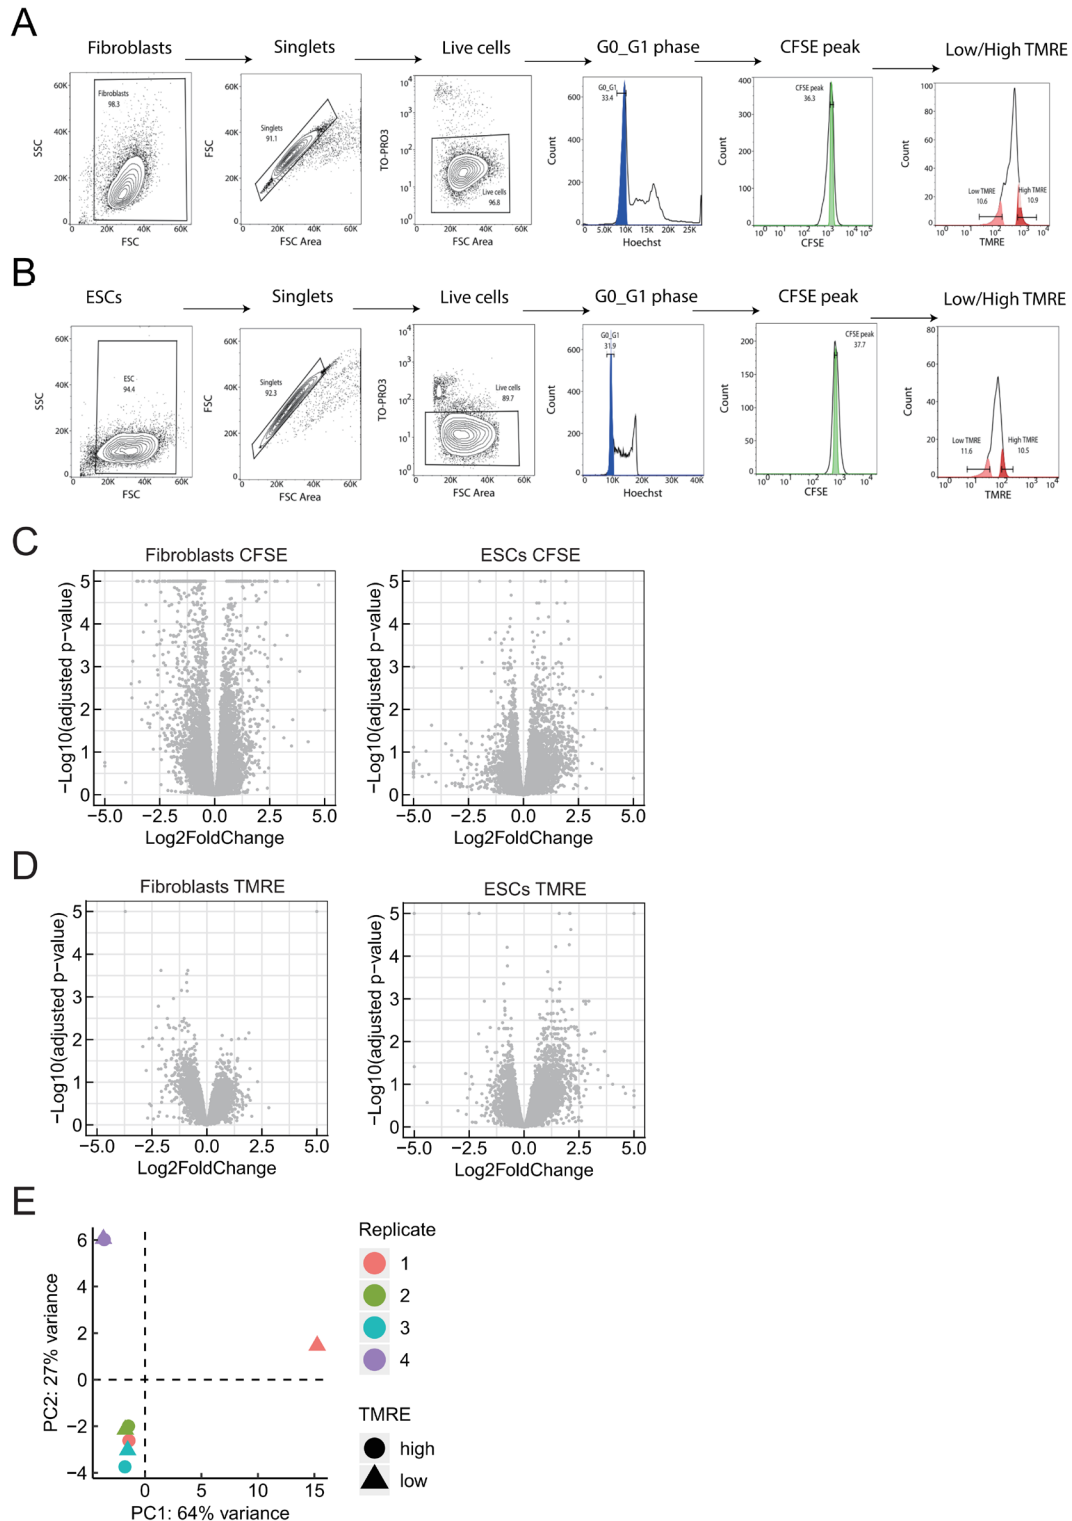

1021

1022

1023

1024

1025

1026

1027

**Figure S5. FACS gating strategy for TMRE staining and volcano plots for fibroblasts and ESCs sorted by CFSE or TMRE.**

**(A, B)** The gating strategy for TMRE staining to get cell subpopulations with different mitochondrial states in fibroblasts **(A)** and in ESCs **(B)**. We use Hoechst to get cells in G0/G1, gate by CFSE to get a more uniform cell population, and separate populations with high and low TMRE signal, then do RNA-seq on each of the two subpopulations. **(C, D)** Deseq2 was



1028 used to calculate log<sub>2</sub> fold change and adjusted p-values for CFSE sorting **(C)** and TMRE  
1029 sorting **(D)**, combining biological replicates. To set the axes to be maximally informative,  
1030 genes with  $p < 10^{-5}$  had p set to  $10^{-5}$ , and those  $abs(log_2 \text{ fold change}) > 5$  were truncated at  
1031 -5 or +5. **(E)** PCA for RNA-seq data of ESCs sorted by TMRE. Low TMRE ESCs of replicate 1  
1032 is an outlier, so we remove replicate 1 for all analysis.  
1033  
1034

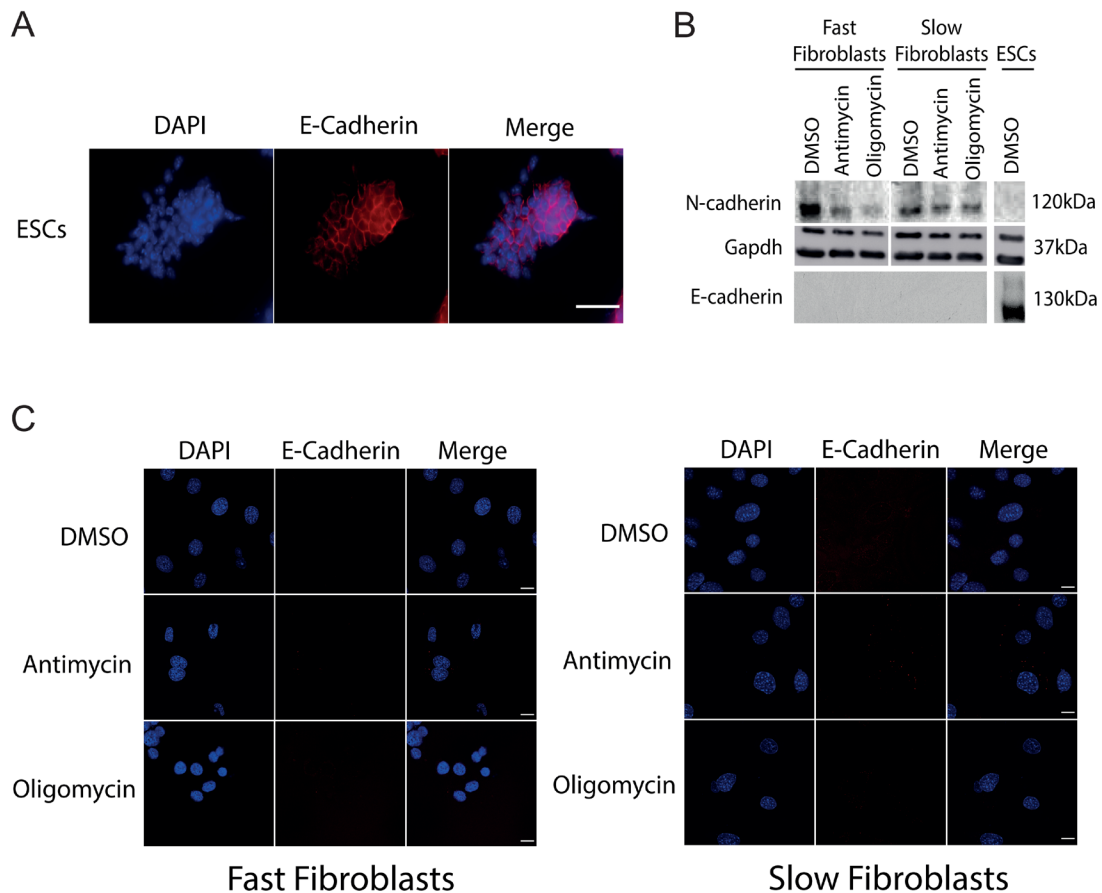

1035  
1036  
1037  
1038  
1039  
1040  
1041  
1042

**Figure S6. N-cadherin and E-cadherin levels in oligomycin and antimycin treated cells.**

**(A)** E-cadherin staining of ESCs as positive control for E-cadherin detection, Scale bar = 80 $\mu$ m.  
**(B)** Western blot for N-cadherin and E-cadherin (Gapdh = loading control) in DMSO- and drug-treated fibroblasts and ESCs. **(C)** Immunostaining for E-cadherin does not show detectable levels in fibroblasts, Scale bars = 15 $\mu$ m.

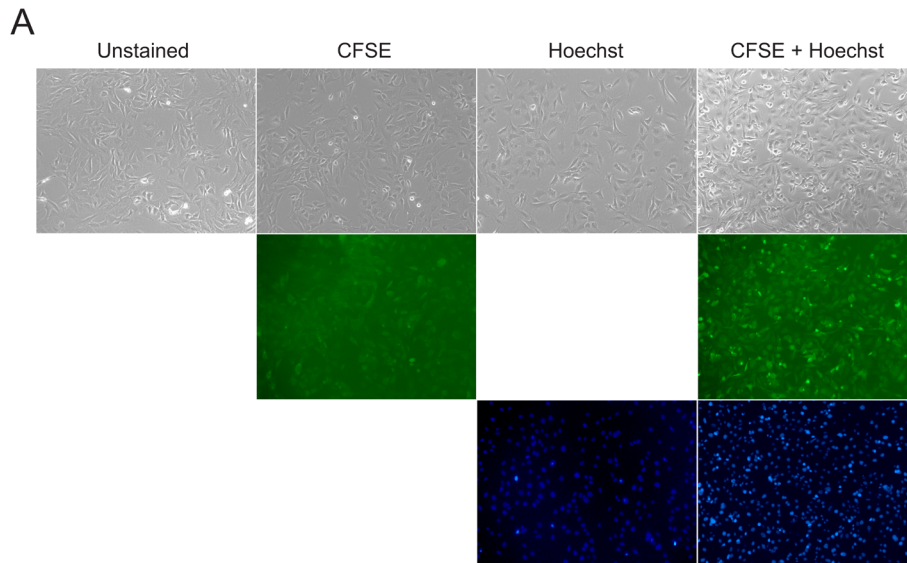

|              | Seeded cell number | Harvested cell number (after 24h) | Viability | Doubling time  |
|--------------|--------------------|-----------------------------------|-----------|----------------|
| Unstained    | 150000             | $3.4 \times 10^5$                 | 97%       | $\approx 20.3$ |
| CFSE         | 150000             | $3.52 \times 10^5$                | 98%       | $\approx 19.5$ |
| Hoechst      | 150000             | $3.34 \times 10^5$                | 98%       | $\approx 20.7$ |
| CFSE+Hoechst | 150000             | $3.46 \times 10^5$                | 96%       | $\approx 19.9$ |

1043

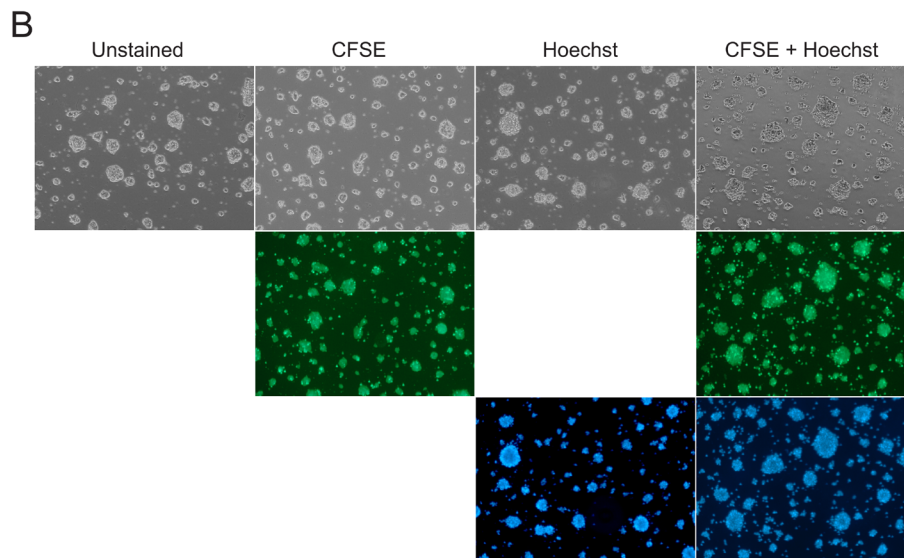

|                | Seeded cell number | Harvested cell number (after 24h) | Viability | Doubling time  |
|----------------|--------------------|-----------------------------------|-----------|----------------|
| Unstained      | 750000             | $2.8 \times 10^6$                 | 90%       | $\approx 12.6$ |
| CFSE           | 750000             | $2.60 \times 10^6$                | 89%       | $\approx 13$   |
| Hoechst        | 750000             | $2.72 \times 10^6$                | 88%       | $\approx 12.9$ |
| CFSE + Hoechst | 750000             | $2.65 \times 10^6$                | 90%       | $\approx 13.1$ |

1044

1045

1046

1047

**Figure S7. The effects of Hoechst and CFSE staining on cell viability and proliferation rates.** Shown are the estimated doubling times (based on the increased in cell number after 24hrs growth) and measured viability (trypan blue) for fibroblasts (**A**) and ESCs (**B**). The microscopy

1048 shows that stained cells maintain the correct morphology.

1049

1050

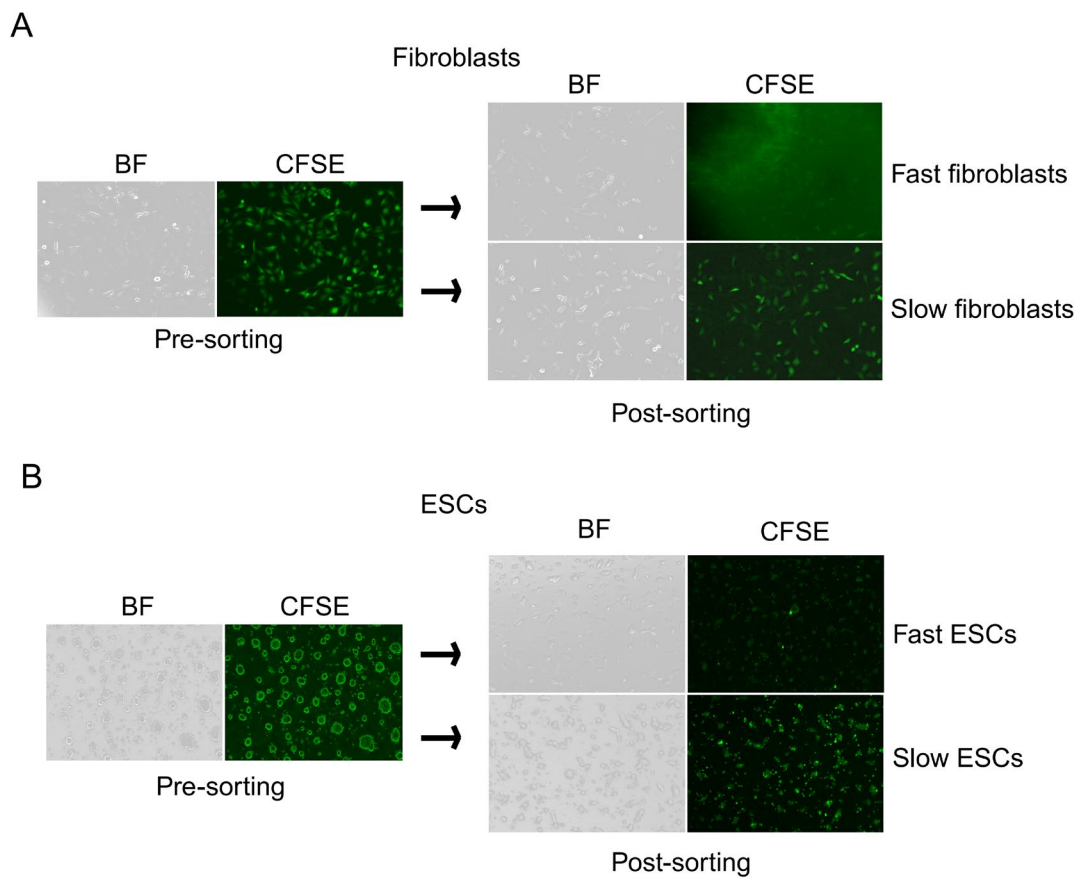

1051

1052 **Figure S8. The images of CFSE staining for both fast and slow proliferating fibroblasts and**  
1053 **ESCs.**

1054 Fibroblasts **(A)** and ESCs **(B)** were stained by CFSE and sorted into two bins: fast proliferating  
1055 cells (low CFSE) and slow proliferating cells (high CFSE).

1056

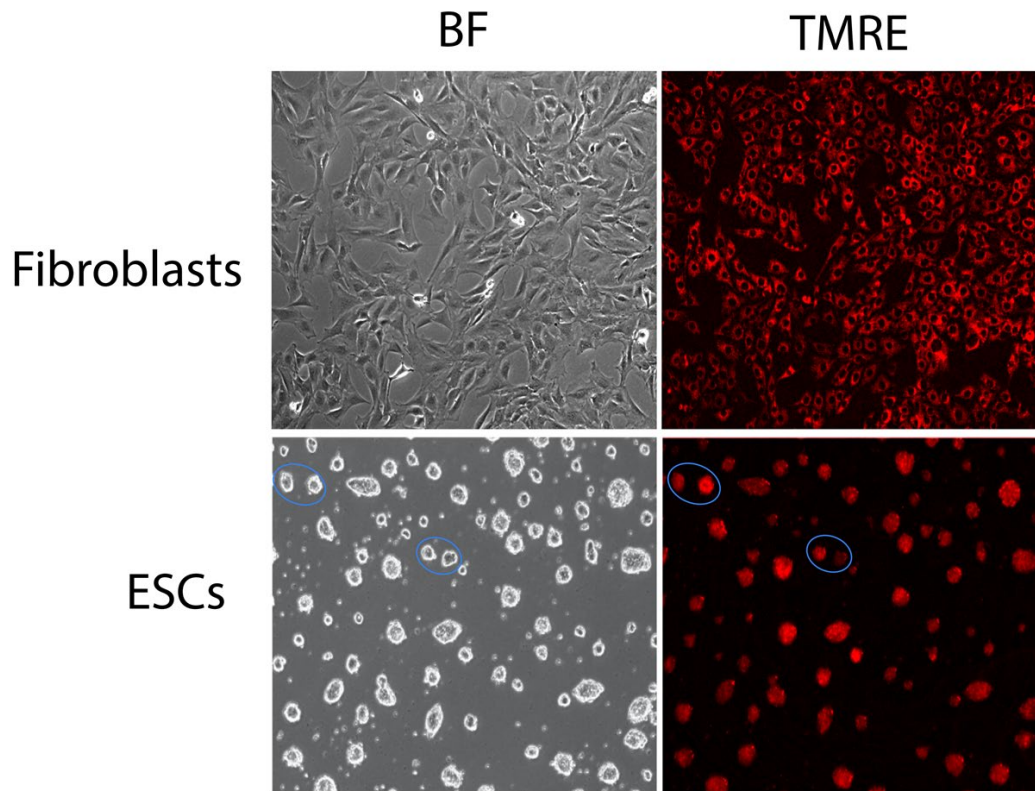

1057

1058 **Figure S9. Images of TMRE staining for fibroblasts and ESCs, showing heterogeneity.**

1059 Bright-field and TMRE staining images for both Fibroblasts and ESCs. Two pairs of ESC  
1060 colonies of similar size but showing staining heterogeneity is circled in blue.

1061

1062

1063

#### 1064 References

1065 1. Min, M. and S.L. Spencer, *Spontaneously slow-cycling subpopulations of human cells*  
1066 *originate from activation of stress-response pathways*. PLOS Biology, 2019. **17**(3): p.  
1067 e3000178.

1068 2. Wakamoto, Y., et al., *Dynamic persistence of antibiotic-stressed mycobacteria*. Science,  
1069 2013. **339**(6115): p. 91-5.

1070 3. Fridman, O., et al., *Optimization of lag time underlies antibiotic tolerance in evolved*  
1071 *bacterial populations*. Nature, 2014. **513**(7518): p. 418-21.

1072 4. Balaban, N.Q., et al., *A problem of persistence: still more questions than answers?* Nature  
1073 Reviews Microbiology, 2013. **11**(8): p. 587-591.

1074 5. Gupta, P.B., et al., *Stochastic state transitions give rise to phenotypic equilibrium in*  
1075 *populations of cancer cells*. Cell, 2011. **146**(4): p. 633-44.

1076 6. Brown, R., et al., *Poised epigenetic states and acquired drug resistance in cancer*. Nat Rev  
1077 Cancer, 2014. **14**(11): p. 747-53.

1078 7. Marusyk, A., V. Almendro, and K. Polyak, *Intra-tumour heterogeneity: a looking glass for*  
1079 *cancer?* Nat Rev Cancer, 2012. **12**(5): p. 323-34.

1080 8. van Dijk, D., et al., *Slow-growing cells within isogenic populations have increased RNA*

- 1081 *polymerase error rates and DNA damage*. Nat Commun, 2015. **6**: p. 7972.
- 1082 9. Dhar, R., et al., *Single cell functional genomics reveals the importance of mitochondria in*  
1083 *cell-to-cell phenotypic variation*. eLife, 2019. **8**: p. e38904.
- 1084 10. Yaakov, G., et al., *Coupling phenotypic persistence to DNA damage increases genetic*  
1085 *diversity in severe stress*. Nat Ecol Evol, 2017. **1**(1): p. 16.
- 1086 11. Paek, A.L., et al., *Cell-to-Cell Variation in p53 Dynamics Leads to Fractional Killing*. Cell,  
1087 2016. **165**(3): p. 631-42.
- 1088 12. Brauer, M.J., et al., *Coordination of Growth Rate, Cell Cycle, Stress Response, and*  
1089 *Metabolic Activity in Yeast*. Molecular Biology of the Cell, 2007. **19**(1): p. 352-367.
- 1090 13. Regenberg, B., et al., *Growth-rate regulated genes have profound impact on*  
1091 *interpretation of transcriptome profiling in Saccharomyces cerevisiae*. Genome biology,  
1092 2006. **7**(11): p. R107-R107.
- 1093 14. Im, H.K., et al., *Mixed effects modeling of proliferation rates in cell-based models:*  
1094 *consequence for pharmacogenomics and cancer*. PLoS genetics, 2012. **8**(2): p.  
1095 e1002525-e1002525.
- 1096 15. Choy, E., et al., *Genetic Analysis of Human Traits In Vitro: Drug Response and Gene*  
1097 *Expression in Lymphoblastoid Cell Lines*. PLOS Genetics, 2008. **4**(11): p. e1000287.
- 1098 16. Cardoso-Moreira, M., et al., *Gene expression across mammalian organ development*.  
1099 Nature, 2019.
- 1100 17. Venet, D., J.E. Dumont, and V. Detours, *Most random gene expression signatures are*  
1101 *significantly associated with breast cancer outcome*. PLoS computational biology, 2011.  
1102 **7**(10): p. e1002240-e1002240.
- 1103 18. Levy, S.F., N. Ziv, and M.L. Siegal, *Bet hedging in yeast by heterogeneous, age-correlated*  
1104 *expression of a stress protectant*. PLoS Biol, 2012. **10**(5): p. e1001325.
- 1105 19. Johnston, I.G., et al., *Mitochondrial Variability as a Source of Extrinsic Cellular Noise*. PLOS  
1106 Computational Biology, 2012. **8**(3): p. e1002416.
- 1107 20. das Neves, R.P., et al., *Connecting variability in global transcription rate to mitochondrial*  
1108 *variability*. PLoS biology, 2010. **8**(12): p. e1000560-e1000560.
- 1109 21. Sukumar, M., et al., *Mitochondrial Membrane Potential Identifies Cells with Enhanced*  
1110 *Stemness for Cellular Therapy*. Cell Metabolism, 2016. **23**(1): p. 63-76.
- 1111 22. Mathieu, J. and H. Ruohola-Baker, *Metabolic remodeling during the loss and acquisition*  
1112 *of pluripotency*. Development, 2017. **144**(4): p. 541.
- 1113 23. Nichols, J. and A. Smith, *Naive and Primed Pluripotent States*. Cell Stem Cell, 2009. **4**(6): p.  
1114 487-492.
- 1115 24. Wray, J., T. Kalkan, and Austin G. Smith, *The ground state of pluripotency*. Biochemical  
1116 Society Transactions, 2010. **38**(4): p. 1027.
- 1117 25. Kolodziejczyk, Aleksandra A., et al., *Single Cell RNA-Sequencing of Pluripotent States*  
1118 *Unlocks Modular Transcriptional Variation*. Cell Stem Cell, 2015. **17**(4): p. 471-485.
- 1119 26. ter Huurne, M., et al., *Distinct Cell-Cycle Control in Two Different States of Mouse*  
1120 *Pluripotency*. Cell Stem Cell, 2017. **21**(4): p. 449-455.e4.
- 1121 27. Nair, G., et al., *Heterogeneous lineage marker expression in naive embryonic stem cells is*  
1122 *mostly due to spontaneous differentiation*. Scientific Reports, 2015. **5**: p. 13339.
- 1123 28. Abranches, E., et al., *Stochastic NANOG fluctuations allow mouse embryonic stem cells to*  
1124 *explore pluripotency*. Development (Cambridge, England), 2014. **141**(14): p. 2770-2779.



- 1125 29. Wytock, T.P. and A.E. Motter, *Predicting growth rate from gene expression*. Proc Natl  
1126 Acad Sci U S A, 2019. **116**(2): p. 367-372.
- 1127 30. Smith, A., *10 Embryonic Stem Cells*. Cold Spring Harbor Monograph Archive; Volume 40  
1128 (2001): Stem Cell Biology, 2001: p. 205-230.
- 1129 31. Cho, B.K., et al., *Homeostasis-stimulated proliferation drives naive T cells to differentiate*  
1130 *directly into memory T cells*. J Exp Med, 2000. **192**(4): p. 549-56.
- 1131 32. Parish, C.R., *Fluorescent dyes for lymphocyte migration and proliferation studies*.  
1132 Immunology & Cell Biology, 1999. **77**(6): p. 499-508.
- 1133 33. Weston, S.A. and C.R. Parish, *New fluorescent dyes for lymphocyte migration studies:*  
1134 *Analysis by flow cytometry and fluorescence microscopy*. Journal of Immunological  
1135 Methods, 1990. **133**(1): p. 87-97.
- 1136 34. Romano, P., et al., *Cell Line Data Base: structure and recent improvements towards*  
1137 *molecular authentication of human cell lines*. Nucleic acids research, 2009. **37**(Database  
1138 issue): p. D925-D932.
- 1139 35. Tamm, C., S. Pijuan Galitó, and C. Annerén, *A Comparative Study of Protocols for Mouse*  
1140 *Embryonic Stem Cell Culturing*. PLOS ONE, 2013. **8**(12): p. e81156.
- 1141 36. Ying, Q.-L., et al., *The ground state of embryonic stem cell self-renewal*. Nature, 2008.  
1142 **453**: p. 519.
- 1143 37. Hayashi, K., et al., *Dynamic equilibrium and heterogeneity of mouse pluripotent stem*  
1144 *cells with distinct functional and epigenetic states*. Cell stem cell, 2008. **3**(4): p. 391-401.
- 1145 38. Toyooka, Y., et al., *Identification and characterization of subpopulations in*  
1146 *undifferentiated ES cell culture*. Development, 2008. **135**(5): p. 909.
- 1147 39. Chambers, I., et al., *Nanog safeguards pluripotency and mediates germline development*.  
1148 Nature, 2007. **450**: p. 1230.
- 1149 40. Nair, G., et al., *Heterogeneous lineage marker expression in naive embryonic stem cells is*  
1150 *mostly due to spontaneous differentiation*. Scientific reports, 2015. **5**: p. 13339-13339.
- 1151 41. Subramanian, A., et al., *Gene set enrichment analysis: A knowledge-based approach for*  
1152 *interpreting genome-wide expression profiles*. Proceedings of the National Academy of  
1153 Sciences, 2005. **102**(43): p. 15545.
- 1154 42. Liberzon, A., et al., *Molecular signatures database (MSigDB) 3.0*. Bioinformatics (Oxford,  
1155 England), 2011. **27**(12): p. 1739-1740.
- 1156 43. Athanasiadou, R., et al., *Growth Rate-Dependent Global Amplification of Gene*  
1157 *Expression*. bioRxiv, 2016: p. 044735.
- 1158 44. Kumatori, A., et al., *Abnormally high expression of proteasomes in human leukemic cells*.  
1159 Proceedings of the National Academy of Sciences of the United States of America, 1990.  
1160 **87**(18): p. 7071-7075.
- 1161 45. Chen, L. and K. Madura, *Increased Proteasome Activity, Ubiquitin-Conjugating Enzymes,*  
1162 *and eEF1A Translation Factor Detected in Breast Cancer Tissue*. Cancer Research, 2005.  
1163 **65**(13): p. 5599.
- 1164 46. Arlt, A., et al., *Increased proteasome subunit protein expression and proteasome activity*  
1165 *in colon cancer relate to an enhanced activation of nuclear factor E2-related factor 2*  
1166 *(Nrf2)*. Oncogene, 2009. **28**: p. 3983.
- 1167 47. Cetin, B. and D.W. Cleveland, *How to survive aneuploidy*. Cell, 2010. **143**(1): p. 27-29.
- 1168 48. Iadevaia, V., R. Liu, and C.G. Proud, *mTORC1 signaling controls multiple steps in*



- 1169 *ribosome biogenesis*. *Semin Cell Dev Biol*, 2014. **36**: p. 113-20.
- 1170 49. Zhang, Y., et al., *Coordinated regulation of protein synthesis and degradation by*  
1171 *mTORC1*. *Nature*, 2014. **513**(7518): p. 440-3.
- 1172 50. Lempiainen, H. and D. Shore, *Growth control and ribosome biogenesis*. *Curr Opin Cell*  
1173 *Biol*, 2009. **21**(6): p. 855-63.
- 1174 51. Choi, J.-H., et al., *mTORC1 accelerates retinal development via the immunoproteasome*.  
1175 *Nature Communications*, 2018. **9**(1): p. 2502.
- 1176 52. Uprety, B., A. Kaja, and S.R. Bhaumik, *TOR Facilitates the Targeting of the 19S*  
1177 *Proteasome Subcomplex To Enhance Transcription Complex Assembly at the Promoters*  
1178 *of the Ribosomal Protein Genes*. *Mol Cell Biol*, 2018. **38**(14).
- 1179 53. Yun, Y.S., et al., *mTORC1 Coordinates Protein Synthesis and Immunoproteasome*  
1180 *Formation via PRAS40 to Prevent Accumulation of Protein Stress*. *Mol Cell*, 2016. **61**(4): p.  
1181 625-639.
- 1182 54. Zhang, Y., et al., *Rapamycin extends life and health in C57BL/6 mice*. *The journals of*  
1183 *gerontology. Series A, Biological sciences and medical sciences*, 2014. **69**(2): p. 119-130.
- 1184 55. Zhao, J., G.A. Garcia, and A.L. Goldberg, *Control of proteasomal proteolysis by mTOR*.  
1185 *Nature*, 2016. **529**: p. E1.
- 1186 56. Gearhart, J., E.E. Pashos, and M.K. Prasad, *Pluripotency redux--advances in stem-cell*  
1187 *research*. *N Engl J Med*, 2007. **357**(15): p. 1469-72.
- 1188 57. Dang, C.V., *MYC, metabolism, cell growth, and tumorigenesis*. *Cold Spring Harbor*  
1189 *perspectives in medicine*. **3**(8): p. a014217.
- 1190 58. *Drosophila myc Regulates Cellular Growth during Development*. *Cell*, 1999. **98**(6): p. 779  
1191 - 790.
- 1192 59. van Riggelen, J., A. Yetil, and D.W. Felsher, *MYC as a regulator of ribosome biogenesis*  
1193 *and protein synthesis*. *Nat Rev Cancer*, 2010. **10**(4): p. 301-9.
- 1194 60. Csibi, A., et al., *The mTORC1/S6K1 pathway regulates glutamine metabolism through the*  
1195 *eIF4B-dependent control of c-Myc translation*. *Curr Biol*, 2014. **24**(19): p. 2274-80.
- 1196 61. Liu, P., et al., *A functional mammalian target of rapamycin complex 1 signaling is*  
1197 *indispensable for c-Myc-driven hepatocarcinogenesis*. *Hepatology*, 2017. **66**(1): p.  
1198 167-181.
- 1199 62. Riley, R.D., et al., *External validation of clinical prediction models using big datasets from*  
1200 *e-health records or IPD meta-analysis: opportunities and challenges*. *BMJ*, 2016. **353**: p.  
1201 i3140.
- 1202 63. Waldman, Y.Y., T. Geiger, and E. Ruppin, *A genome-wide systematic analysis reveals*  
1203 *different and predictive proliferation expression signatures of cancerous vs.*  
1204 *non-cancerous cells*. *PLoS Genet*, 2013. **9**(9): p. e1003806.
- 1205 64. Macfarlan, T.S., et al., *Embryonic stem cell potency fluctuates with endogenous retrovirus*  
1206 *activity*. *Nature*, 2012. **487**(7405): p. 57-63.
- 1207 65. Hicks, S.C., et al., *Missing data and technical variability in single-cell RNA-sequencing*  
1208 *experiments*. *Biostatistics*, 2017. **19**(4): p. 562-578.
- 1209 66. Packer, J.S., et al., *A lineage-resolved molecular atlas of <em>C. elegans</em>*  
1210 *embryogenesis at single-cell resolution*. *Science*, 2019: p. eaax1971.
- 1211 67. Sulston, J.E., et al., *The embryonic cell lineage of the nematode Caenorhabditis elegans*.  
1212 *Dev Biol*, 1983. **100**(1): p. 64-119.

- 1213 68. Altun, Z.F., Herndon, L.A., Wolkow, C.A., Crocker, C., Lints, R. and Hall, D.H. *WormAtlas*.  
1214 (ed.s) 2002-2020.
- 1215 69. Petropoulos, S., et al., *Single-Cell RNA-Seq Reveals Lineage and X Chromosome*  
1216 *Dynamics in Human Preimplantation Embryos*. Cell, 2016. **167**(1): p. 285.
- 1217 70. Deng, Q., et al., *Single-cell RNA-seq reveals dynamic, random monoallelic gene*  
1218 *expression in mammalian cells*. Science, 2014. **343**(6167): p. 193-6.
- 1219 71. Samavarchi-Tehrani, P., et al., *Functional Genomics Reveals a BMP-Driven*  
1220 *Mesenchymal-to-Epithelial Transition in the Initiation of Somatic Cell Reprogramming*.  
1221 Cell Stem Cell, 2010. **7**(1): p. 64-77.
- 1222 72. Li, R., et al., *A Mesenchymal-to-Epithelial Transition Initiates and Is Required for the*  
1223 *Nuclear Reprogramming of Mouse Fibroblasts*. Cell Stem Cell, 2010. **7**(1): p. 51-63.
- 1224 73. Sun, H., et al., *Metabolic switch and epithelial-mesenchymal transition cooperate to*  
1225 *regulate pluripotency*. EMBO J, 2020. **39**(8): p. e102961.
- 1226 74. Conn, C.S. and S.B. Qian, *Nutrient signaling in protein homeostasis: an increase in*  
1227 *quantity at the expense of quality*. Sci Signal, 2013. **6**(271): p. ra24.
- 1228 75. Valvezan, A.J. and B.D. Manning, *Molecular logic of mTORC1 signalling as a metabolic*  
1229 *rheostat*. Nature Metabolism, 2019. **1**(3): p. 321-333.
- 1230 76. Teslaa, T. and M.A. Teitell, *Pluripotent stem cell energy metabolism: an update*. The  
1231 EMBO journal, 2015. **34**(2): p. 138-153.
- 1232 77. Lu, V. and M.A. Teitell, *Alpha-ketoglutarate: a "magic" metabolite in early germ cell*  
1233 *development*. 2019. **38**(1): p. e100615.
- 1234 78. Tischler, J., et al., *Metabolic regulation of pluripotency and germ cell fate through*  
1235  *$\alpha$ -ketoglutarate*. 2019. **38**(1): p. e99518.
- 1236 79. Brown, M., et al., *A recombinant murine retrovirus for simian virus 40 large T cDNA*  
1237 *transforms mouse fibroblasts to anchorage-independent growth*. Journal of virology,  
1238 1986. **60**(1): p. 290-293.
- 1239 80. Minajigi, A., et al., *A comprehensive Xist interactome reveals cohesin repulsion and an*  
1240 *RNA-directed chromosome conformation*. Science, 2015: p. aab2276.
- 1241 81. Lee, J.T. and N. Lu, *Targeted mutagenesis of Tsix leads to nonrandom X inactivation*. Cell,  
1242 1999. **99**(1): p. 47-57.
- 1243 82. Bray, N.L., et al., *Erratum: Near-optimal probabilistic RNA-seq quantification*. Nat  
1244 Biotechnol, 2016. **34**(8): p. 888.
- 1245 83. Leek, J.T., et al., *The sva package for removing batch effects and other unwanted*  
1246 *variation in high-throughput experiments*. Bioinformatics, 2012. **28**(6): p. 882-3.
- 1247 84. Kolodziejczyk, A.A., et al., *Single Cell RNA-Sequencing of Pluripotent States Unlocks*  
1248 *Modular Transcriptional Variation*. Cell Stem Cell, 2015. **17**(4): p. 471-85.
- 1249 85. Boroviak, T., et al., *The ability of inner-cell-mass cells to self-renew as embryonic stem*  
1250 *cells is acquired following epiblast specification*. Nat Cell Biol, 2014. **16**(6): p. 516-28.
- 1251 86. Young, R.A., *Control of the embryonic stem cell state*. Cell, 2011. **144**(6): p. 940-954.
- 1252 87. Crowley, L.C., M.E. Christensen, and N.J. Waterhouse, *Measuring Mitochondrial*  
1253 *Transmembrane Potential by TMRE Staining*. Cold Spring Harb Protoc, 2016. **2016**(12).
- 1254 88. Liberzon, A., et al., *Molecular signatures database (MSigDB) 3.0*. Bioinformatics, 2011.  
1255 **27**(12): p. 1739-40.
- 1256 89. Subramanian, A., et al., *Gene set enrichment analysis: a knowledge-based approach for*

- 1257 *interpreting genome-wide expression profiles*. Proc Natl Acad Sci U S A, 2005. **102**(43): p.  
1258 15545-50.
- 1259 90. Shannon, P., et al., *Cytoscape: a software environment for integrated models of*  
1260 *biomolecular interaction networks*. Genome Res, 2003. **13**(11): p. 2498-504.
- 1261 91. Merico, D., et al., *Enrichment map: a network-based method for gene-set enrichment*  
1262 *visualization and interpretation*. PLoS One, 2010. **5**(11): p. e13984.
- 1263 92. Reimand, J., et al., *Pathway enrichment analysis and visualization of omics data using*  
1264 *g:Profiler, GSEA, Cytoscape and EnrichmentMap*. Nat Protoc, 2019. **14**(2): p. 482-517.
- 1265 93. Durinck, S., et al., *BioMart and Bioconductor: a powerful link between biological*  
1266 *databases and microarray data analysis*. Bioinformatics, 2005. **21**(16): p. 3439-3440.
- 1267 94. Durinck, S., et al., *Mapping identifiers for the integration of genomic datasets with the*  
1268 *R/Bioconductor package biomaRt*. Nat Protoc, 2009. **4**(8): p. 1184-91.
- 1269 95. Airoldi, E.M., et al., *Steady-state and dynamic gene expression programs in*  
1270 *Saccharomyces cerevisiae in response to variation in environmental nitrogen*. Mol Biol  
1271 Cell, 2016. **27**(8): p. 1383-96.
- 1272 96. Slavov, N. and D. Botstein, *Coupling among growth rate response, metabolic cycle, and*  
1273 *cell division cycle in yeast*. Mol Biol Cell, 2011. **22**(12): p. 1997-2009.
- 1274 97. Barbie, D.A., et al., *Systematic RNA interference reveals that oncogenic KRAS-driven*  
1275 *cancers require TBK1*. Nature, 2009. **462**(7269): p. 108-12.
- 1276 98. Hanzelmann, S., R. Castelo, and J. Guinney, *GSEA: gene set variation analysis for*  
1277 *microarray and RNA-seq data*. BMC Bioinformatics, 2013. **14**: p. 7.
- 1278 99. Rohatgi, A., *WebPlotDigitizer*. 2017, Austin, Texas, USA.  
1279
